1 **Repeat-driven generation of antigenic diversity in a major human**  
2 **pathogen, *Trypanosoma cruzi***

3

4 Carlos Talavera-López<sup>1Φ</sup>, Louisa A. Messenger<sup>2</sup>, Michael D. Lewis<sup>2</sup>, Matthew Yeo<sup>2</sup>, João Luís Reis-  
5 Cunha<sup>3</sup>, Daniella C. Bartholomeu<sup>3</sup>, José E. Calzada<sup>4</sup>, Azael Saldaña<sup>4</sup>, Juan David Ramírez<sup>5</sup>, Felipe  
6 Guhl<sup>6</sup>, Sofía Ocaña-Mayorga<sup>7</sup>, Jaime A. Costales<sup>7</sup>, Rodion Gorchakov<sup>8</sup>, Kathryn Jones<sup>8</sup>, Melissa  
7 Nolan Garcia<sup>8</sup>, Edmundo C. Grisard<sup>9</sup>, Santuza M. R. Teixeira<sup>10</sup>, Hernán Carrasco<sup>11</sup>, Maria Elena  
8 Bottazzi<sup>8</sup>, Peter J. Hotez<sup>8</sup>, Kristy O. Murray<sup>8</sup>, Mario J. Grijalva<sup>7, 12</sup>, Barbara Burleigh<sup>13</sup>, Michael A.  
9 Miles<sup>2</sup>, Björn Andersson<sup>1\*</sup>.

10

11 1 - Department of Cell and Molecular Biology; Karolinska Institutet; Stockholm, Sweden.

12 2 - London School of Hygiene and Tropical Medicine; London, United Kingdom.

13 3 – Departamento de Parasitologia, Universidade Federal de Minas Gerais; Belo Horizonte MG, Brazil.

14 4 - Departamento de Parasitología, Instituto Conmemorativo Gorgas de Estudios de la Salud; Ciudad de  
15 Panamá, Panamá.

16 5 - Facultad de Ciencias Naturales y Matemáticas, Universidad del Rosario; Bogotá, Colombia.

17 6 - Grupo de Investigaciones en Microbiología y Parasitología Tropical (CIMPAT), Universidad de Los Andes;  
18 Bogotá, Colombia.

19 7 - Centro de Investigación para la Salud en América Latina (CISeAL), Escuela de Ciencias Biológicas;  
20 Pontificia Universidad Católica del Ecuador; Quito, Ecuador.

21 8 - Sabin Vaccine Institute and Texas Children's Hospital Center for Vaccine Development, National School of  
22 Tropical Medicine; Baylor College of Medicine; Houston TX, United States.

23 9 – Departamento de Microbiologia, Imunologia e Parasitologia; Universidade Federal Santa Catarina;  
24 Florianópolis, SC, Brazil.

25 10 – Departamento de Bioquímica e Imunologia, Universidade Federal de Minas Gerais; Belo Horizonte MG,  
26 Brazil.

27 11- Universidad Central de Venezuela; Caracas, Venezuela.

28 12 - Infectious and Tropical Disease Institute, Department of Biomedical Sciences, Heritage College of  
29 Osteopathic Medicine, Ohio University; Athens OH, United States.

30 13 - T.H. Chan School of Public Health; Harvard University; Boston MA, United States.

31

32 \* - Corresponding author

33 <sup>Φ</sup> - Current address: The Francis Crick Institute; London, United Kingdom.

34

35

36

37

38

39

40

41

42

43

44

45

46

47

48

49

50

51

52

53

54

55

56

57 **ABSTRACT:**

58

59 *Trypanosoma cruzi*, a zoonotic kinetoplastid protozoan with a complex genome, is the causative  
60 agent of American trypanosomiasis (Chagas disease). The parasite uses a highly diverse repertoire  
61 of surface molecules, with roles in cell invasion, immune evasion and pathogenesis. Thus far, the  
62 genomic regions containing these genes have been impossible to resolve and it has been impossible  
63 to study the structure and function of the several thousand repetitive genes encoding the surface  
64 molecules of the parasite. We here present an improved genome assembly of a *T. cruzi* clade I (Tcl)  
65 strain using high coverage PacBio single molecule sequencing, together with Illumina sequencing of  
66 34 *T. cruzi* Tcl isolates and clones from different geographic locations, sample sources and clinical  
67 outcomes. Resolution of the surface molecule gene structure reveals an unusual duality in the  
68 organisation of the parasite genome, a core genomic region syntenous with related protozoa  
69 flanked by unique and highly plastic subtelomeric regions encoding surface antigens. The presence  
70 of abundant interspersed retrotransposons in the subtelomeres suggests that these elements are  
71 involved in a recombination mechanism for the generation of antigenic variation and evasion of the  
72 host immune response. The comparative genomic analysis of the cohort of Tcl strains revealed  
73 multiple cases of such recombination events involving surface molecule genes and has provided  
74 new insights into *T. cruzi* population structure.

75

76

77

78

79

80

81

82 **INTRODUCTION:**

83

84 *Trypanosoma cruzi* is a kinetoplastid protozoan and the etiologic agent of Chagas disease,  
85 considered to be the most important human parasitic disease in Latin America. The Global Burden  
86 of Disease Study 2013 reported that almost 7 million people live with Chagas disease in the Western  
87 Hemisphere <sup>1</sup>, with the expectation that up to one third will progress to develop chronic chagasic  
88 cardiomyopathy (CCC) or other life-threatening symptoms. In 2015, 5,742,167 people were  
89 estimated to be infected with *T. cruzi* in 21 Latin American countries and around 13 % of the Latin  
90 American population is at risk of contracting *T. cruzi* infection due to domicile infestation of  
91 triatomine bugs or due to non-vectorial transmission via blood transfusion, organ transplant, oral,  
92 congenital or accidental infection <sup>2</sup>. **Human Chagas disease is not restricted to Latin America.**  
93 Migration of infected humans to non-endemic areas has made it a new public health threat in other  
94 geographic areas such as North America, Europe and Asia <sup>4</sup>. Also, sylvatic *T. cruzi* transmission  
95 cycles, often associated with human disease, have been described in areas formerly considered as  
96 free from this disease such as in Texas (USA)<sup>4</sup>.

97

98 The acute phase of the disease frequently lacks specific symptoms, is often undiagnosed and  
99 usually resolves in a few weeks in immunocompetent individuals but may be fatal in around 5% of  
100 diagnosed cases. Without successful treatment, a *T. cruzi* infection is normally carried for life. The  
101 disease progresses to either a chronic indeterminate phase that is asymptomatic, or to a chronic  
102 symptomatic phase with severe clinical syndromes such as cardiomyopathy, megaesophagus  
103 and/or megacolon <sup>5</sup>; meningoencephalitis may occur, especially in immunocompromised patients <sup>4</sup>.  
104 The current prolonged chemotherapy (benznidazole or nifurtimox) is mostly effective only in the  
105 acute phase, particularly because side effects may interrupt treatment of adults in the chronic  
106 phase. There is currently no effective treatment for advanced chagasic cardiomyopathy <sup>6</sup>, and there  
107 is an urgent need to identify new potential drug and vaccine targets <sup>7</sup>.

108

109 *T. cruzi* infection is a zoonosis, and the parasite has a complex life cycle; where transmission to  
110 humans occurs most frequently by contamination with infected feces from triatomine insect  
111 vectors (Subfamily Triatominae). The parasite evades the immune responses with the aid of  
112 multiple surface molecules from three large diverse gene families (Trans-Sialidases, Mucins and  
113 Mucin-Associated Surface Proteins - MASPs), which are also involved in cell invasion and possibly  
114 pathogenicity<sup>8</sup>.

115

116 Six distinct genetic clades of *T. cruzi* have been recognised, named TcI to TcVI (discrete typing units,  
117 DTU-I to VI). The first genome sequence for *T. cruzi* was produced using Sanger sequencing  
118 technology from a hybrid, highly polymorphic, TcVI strain. The resultant genome sequence, while  
119 extremely useful for the core regions of the genome, was highly fragmented, especially in repetitive  
120 regions<sup>9</sup>. This sequence has been improved using enhanced scaffolding algorithms, but the  
121 repetitive regions remained unresolved<sup>10</sup>. Subsequently, FLX 454 Titanium and Illumina sequencing  
122 were used to sequence a less polymorphic TcI strain (Sylvio X10/1), which allowed the first  
123 comparative genomic studies of *T. cruzi*, but correct assembly of repetitive regions was still  
124 impossible<sup>11,12</sup>. The thousands of related genes that code for the surface proteins are generally  
125 located in large, subtelomeric regions of the *T. cruzi* genome<sup>13</sup>, in the form of extremely repetitive  
126 segments with multiple gene copies and pseudogenes. These subtelomeric regions are distinct from  
127 the core regions of the genome in synteny, gene content and diversity<sup>22</sup>. The repetitive nature of  
128 the tandem arrays and the length of the subtelomeric repeat regions, have made correct assembly  
129 impossible using short and medium-sized sequence reads. The available *T. cruzi* genome sequences  
130 are therefore incomplete and erroneous in these important regions, making it impossible to study  
131 the complex surface gene families.

132

133 The population structure of *T. cruzi* is complex, and there is a high degree of genetic and phenotypic  
134 variation. The current TcI to TcVI clades are based on biochemical and molecular markers<sup>14</sup>,

135 although there is substantial diversity even within these six groups<sup>15</sup>. The TcI clade is widespread  
136 and can be found across the American continent, and has been associated with CCC<sup>16</sup> and sudden  
137 death<sup>17,18</sup>, among other clinical manifestations.

138

139 We have produced a complete and reliable reference sequence of the entire *T. cruzi* TcI Sylvio X10/1  
140 genome, and we have generated Illumina sequencing data for 34 *T. cruzi* TcI isolates and clones  
141 from different geographic locations for comparative analyses. Thus, we have been able to decipher  
142 the complete organisation of the *T. cruzi* subtelomeric surface gene repertoire of the TcI Sylvio  
143 X10/1 strain, revealing large numbers of evenly spaced retrotransposons, which may play a role in  
144 generating genomic structural diversity and antigenic variation. Furthermore, the comparative data  
145 enabled the first exploration of whole-genome population genetics of *T. cruzi* in different  
146 environments and geographic locations. We found patterns of active recombination associated with  
147 generation of new surface molecule variants. Together, these results contribute to answering  
148 longstanding questions on the biology of Chagas disease and parasitism in general. The availability  
149 of the complete repertoire of genes encoding surface molecules allows further research on virulence  
150 and pathogenesis, as well as the identification of drug targets and vaccine candidates.

151

152

153

154

155

156

157 **RESULTS:**

158 **Genome sequence of *Trypanosoma cruzi* DTU-I Sylvio X10/1:**

159 The final Sylvio X10/1 genome assembly reconstructed 98.5 % of the estimated strain genome size  
160 and was contained in 47 scaffolds - which here will be referred to as pseudomolecules - assembled

161 from 210 X PacBio sequence data and a previous Illumina data set (**Table 1**). Comparison with the  
162 available assembly of the TcVI strain CL Brener revealed a conserved core of syntenic blocks  
163 composed of stretches of homologous sequences separated by large gaps of sequence that were  
164 not reconstructed in TcVI. These gaps corresponded to most of the surface molecule gene arrays  
165 and simple repeats in the Sylvio X10/1 genome (**Figure 1a**). The length of the PacBio reads and the  
166 high coverage allowed the reconstruction of long stretches of repetitive sequences (**Figure 1b**) that  
167 could not be resolved using shorter read data.

168

169 The coverage of genomic regions coding for surface molecules supported the correct reconstruction  
170 of these areas (**Supplementary figure 1**). To further investigate the quality of the new assembly,  
171 Illumina short reads were mapped and analysed with FRC\_bam, which revealed assembly artefacts  
172 related to low coverage, wrong paired end read orientation, and higher than expected sequencing  
173 coverage in regions with long stretches of simple repeats.

174

175 Repetitive elements comprised 18.43 % of the TcI Sylvio X10/1 genome, 2.18 % of which cannot be  
176 classified using the repeat databases. LINE retroelements of the R1/Jockey group (3.63 %) and  
177 VIPER LTRs (2.87 %) were found to be the most prevalent types of retroelements, covering 6.89 %  
178 of the genome, which is much higher than the 2.57 % estimated from the previously published  
179 Sylvio X10/1 draft assembly<sup>12</sup>.

180

181 Although retrotransposons were found to be present throughout the genome, the frequency of  
182 VIPER and L1Tc elements was markedly higher in subtelomeric regions and they were found within  
183 one kilobase of pseudogenes, hypothetical proteins and surface molecule gene tandem arrays  
184 (One-sided Fisher exact test, *p-value* < 1.32 e-16). This distribution indicates that these elements  
185 may play a role in the generation of new sequence diversity in the subtelomeric gene families by  
186 providing a source of microhomology. It is compelling to speculate that they could act as

187 transcriptional regulators by the introduction of novel transcription start sites, as has been  
188 proposed in other eukaryotes <sup>19</sup>; nevertheless, we do not have experimental evidence for the  
189 activity of these retroelements in *T. cruzi*.

190

191 Simple and low complexity repeats were observed surrounding subtelomeric coding sequences and  
192 were also more abundant in the subtelomeric regions (2.18 %), extending up to 4 Kb, compared to  
193 core regions (0.98 %) where they were much shorter (10 - 120 bp). The most prevalent type of  
194 simple repeat had the (C)<sub>n</sub> motif (11.7 %), (TG)<sub>n</sub> repeat motif (5.6 %) and (CA)<sub>n</sub> repeat motif (5.1 %);  
195 each variable in length. This microhomology of the simple subtelomeric repeats may facilitate  
196 recombination for the generation of new surface molecule variants, as described in other parasitic  
197 protozoa, including *Trypanosoma brucei* and *Plasmodium falciparum* <sup>20,21</sup>.

198

199 A total of 19,096 evidence-supported genes were identified in the TcI Sylvio X10/1 haploid genome  
200 sequence, compared to the higher estimate of 22,570 for TcVI CL Brener, mostly due to the larger  
201 size of the subtelomeres in the TcVI hybrid genome. The core regions of the genome were found to  
202 correspond well to results generated previously using short read sequencing of the same strain <sup>11</sup>, in  
203 both gene organisation and content. Tandemly repeated genes that were collapsed in previous *T.*  
204 *cruzi* genome assemblies were now resolved. About 24.1% (n = 4,602) of the total annotated genes  
205 were truncated, mostly due to the introduction of premature stop codons, and 67 % of these were in  
206 subtelomeric regions located within surface molecule gene arrays, sharing motifs of the complete  
207 genes.

208

209 The new assembly allowed the first analysis of the complete *T. cruzi* surface molecule gene  
210 repertoire. Genes of each of the three major surface molecules families were organised as multiple  
211 tandem arrays. After genome annotation, the total number of such arrays were: trans-sialidases,  
212 312, with 2,048 complete gene copies and 201 pseudogenes; mucins 98, with 2,466 complete copies



213 and 111 pseudogenes; MASPs 264, with 1,888 complete copies and 245 pseudogenes. These three  
214 surface molecule gene families comprised 16.02 Mbp (39.04 %) of the TcI Sylvio X10/1 genome and  
215 presented a high level of sequence diversity (**Supplementary figure 2**). Sequence strand switches  
216 often delimited the surface molecule tandem arrays. Commonly, these arrays had two to four  
217 complete copies immediately followed by two or more truncated copies with motifs similar to the  
218 complete gene. The intergenic spaces between arrays were rich in simple and low complexity  
219 repeats with no identifiable regulatory elements. The VIPER and L1Tc retrotransposon elements, in  
220 clusters of two to four copies, were found in the proximity of, or inside, tandem arrays containing  
221 trans-sialidases, mucins and MASP genes. As the surface molecule genes are known to evolve  
222 rapidly and be highly variable <sup>22</sup>, the enrichment of VIPER and L1Tc elements in these regions  
223 supports the hypothesis that they may be involved in generating new surface molecule gene  
224 variants via recombination mediated by sequence homology.

225

226 Both, Ser/Thr kinases and DEAD-box RNA helicase genes were found at both extremes of 34 (10.81  
227 %) trans-sialidase arrays located in pseudomolecules 1, 2 and 8. Searches against the RFAM  
228 database identified 1,618 small RNAs in the TcI Sylvio X10/1 genome. These were mostly ribosomal  
229 RNAs with the 5S rDNA subunit being the most common (31.9 %) followed by ACA Box snoRNAs  
230 (30.9 %), SSU rDNA (12.2 %) and LSU rDNA (10.2 %) subunits. We also found hits to telomerase  
231 RNA component (TERC), Catabolite Repression Control sequester (CrcZ), Protozoa Signal  
232 Recognition Particle RNAs, spliceosomal RNA subunits and miRNAs. The putative miRNAs  
233 identified in Sylvio X10/1 belong to the MIR2118 and MIR1023 families, previously not found in  
234 protozoan parasites. The functional relevance of these predicted small RNAs will need to be further  
235 validated *in vitro*. The miRNA segments were located in both strands within 1 Kb of genes coding for  
236 DEAD-box RNA helicases surrounding surface molecule gene tandem arrays.

237

238 **Genomic variation within the *Trypanosoma cruzi* TcI clade:**

239 Intra-Tcl genomic diversity was examined among 34 samples from six countries: United States,  
240 Mexico, Panama, Colombia, Venezuela and Ecuador, derived from a range of triatomine vectors and  
241 human patients of different clinical stages (**Table 2** and **Supplementary table 1**). Our hybrid  
242 variant calling strategy allowed us to identify genomic variants in the core and subtelomeric  
243 regions in a reliable fashion (See methods).

244

245 A total of 1,031,785 SNPs and 279,772 INDELs shorter than 50 bp were called - relative to the Sylvio  
246 X10/cl1 genome - for all the sequenced isolates. INDELs presented an average density of 5.3 variants  
247 per Kb and SNPs 24.1 variants per Kb. An individual *T. cruzi* Tcl isolate was found to contain an  
248 average of 61,000 SNPs and 6,820 INDELs with a density of 31.8 variants per Kb. However, these  
249 measures fluctuated depending on the geographical and biological source of the sample. Core  
250 regions had an average SNP density of 0.4 variants per Kb, in contrast with subtelomeric regions  
251 where values of 10 variants per Kb were found. It was not surprising that the bulk of the genomic  
252 variants were located in the subtelomeric regions in all the isolates, with fewer differences in the  
253 core regions. Although several studies using single gene markers have identified heterogeneity in  
254 the Tcl clade <sup>15,23</sup>, the extent of this variation has not been assessed genome-wide.

255

256 The majority of INDELs (96 %) were found in intergenic or noncoding regions, and 81 % of those  
257 were located in subtelomeric regions. INDELs within coding sequences were exclusively found to  
258 cause frameshifts turning the affected coding sequence into a pseudogene. This distribution of  
259 INDELs is a genomic signature that has been associated with non-allelic homologous recombination  
260 due to unequal crossing over <sup>24</sup> or microhomology-mediated end joining <sup>25,26</sup> (**Table 3**). Short  
261 insertions were more prevalent than short deletions, a pattern common to all the analysed Tcl  
262 genomes when compared to Sylvio X10/1. In the subtelomeric regions, short insertions (1 - 3 bp)  
263 occurred within the upstream and downstream portions of the coding sequences and usually  
264 involved the addition of one or more cytosines or guanines. Deletions of 1 bp indicating the removal

265 of an adenine or thymine were also observed within these regions, but at a lower frequency. Longer  
266 deletions (5 - 20 bp) and insertions (8 - 10 bp) were observed within trans-sialidases,  
267 Retrotransposon Hot Spot (RHS), pseudogenes and, at a lower frequency, L1Tc retroelements.

268

#### 269 **Population genomics of the *Trypanosoma cruzi* TcI clade:**

270 We used the short genomic variants to analyse the population genomics of the *T. cruzi* TcI clade,  
271 and where possible taking into account the different sample sources (insect vector or human host),  
272 clinical outcome of the infected patients and geographic locations (**Supplementary table 1**). This  
273 sampling strategy allowed comparison of parasite population structure in different environments.  
274 Interestingly, a Bayesian PCA analysis using INDELs and an IBD-based hierarchical clustering using  
275 only SNPs for all the samples showed a mostly geography-specific population structure (**Figure 2a**  
276 and **supplementary figure 3**).

277

278 The analysis of the variation between two Colombian TcI isolates made it possible to compare  
279 parasites from a HIV-positive patient with fatal cardiomyopathy (CG) and from an acute chagasic  
280 patient infected by oral transmission (FChc). For each strain, replicate clones from the original  
281 sample were isolated and cultured under the same conditions, and five of the replicates from each  
282 sample were sequenced in a single Illumina HiSeq 2500 run and 158,565 well supported SNPs were  
283 called. Using this set of SNPs we calculated global and per-site population genetic statistics. These  
284 samples displayed distinctive behaviour in a global analysis of genomic diversity by separating into  
285 two well-defined clusters, as can be seen in **Figure 2b**. Linkage Disequilibrium (LD) analyses were  
286 performed genome-wide for both groups using the  $r^2$  statistic; revealing a fluctuating pattern of LD  
287 across the entire genome with large blocks of low  $r^2$  values - implying a recombinatorial process -  
288 present at distinctive chromosomal locations that were specific to each group of clones.  
289 Particularly, CG clones had less genetic diversity than FChc clones (**Figure 3a**) and displayed a trend  
290 towards LD, whereas FChc clones presented more dynamic LD pattern. Values of  $r^2$  near zero were

291 more common in LD sliding windows containing genes coding for surface molecules and  $r^2$  values  
292 closer to one were present exclusively in core regions rich in housekeeping genes, indicating that  
293 these regions are more stable. For the CG and FcHc clones we calculated a global Fixation index  
294 ( $F_{st}$ ) value of -0.9377958 and -0.1162212 respectively (**Figure 3b**). These values are consistent with  
295 genetic differentiation in recombination hotspots in the subtelomeric regions. The global Tajima's  
296 D value for the CG clones was 1.373 and 0.9906 for FcHc clones, suggesting the presence of multiple  
297 alleles at variable frequencies in both populations (**Figure 3c**). This pattern was more evident in the  
298 subtelomeric regions, which is consistent with balancing selection of surface molecules.

299

300 Analyses of genomic variation between samples isolated from humans and vectors from Mexico,  
301 Panama and Ecuador revealed that the global genetic differentiation among samples isolated from  
302 vectors was  $F_{st} = 0.1289547$  whereas for samples isolated from humans the observed was  $F_{st} = -$   
303  $0.05521983$ . The patterns of linkage disequilibrium between human and vector derived isolates  
304 were similar to those observed in the Colombian clones. Estimates of the Tajima's D statistic  
305 revealed a distinctive pattern of selection between the two groups. Balancing selection was  
306 detected specifically in regions containing tandem gene arrays coding for surface molecules in all  
307 the samples derived from vectors, regardless of their geographical origin; whereas selective sweeps  
308 were present in the same regions in human-derived samples. Large genomic areas (> 50 Kb)  
309 containing surface molecule genes displayed negative Tajima's D values in human-derived isolates,  
310 in contrast with the pattern observed in vector-derived isolates with long genomic stretches (> 70  
311 Kb) of positive Tajima's D values and short genomic blocks (< 5 Kb) with negative values.

312

### 313 **Genome structural variation:**

314 Genomic structural variants, such as deletions, tandem and interspersed duplications, genomic  
315 inversions and chromosomal break-ends, were observed ubiquitously throughout the genomes of  
316 the analysed TcI strains. The most common type of intrachromosomal structural variant observed

317 was tandem duplications followed by deletions larger than 50 Kb (**Table 2**). Chromosomal break-  
318 ends, similar to the unbalanced chromosomal translocations observed in higher eukaryotes, were  
319 the most abundant type of structural rearrangement and they were only present in genomic regions  
320 that were statistically enriched with retroelements and simple repeats. These areas presented a  
321 conserved pattern: they contained surface molecule gene tandem arrays and their breakpoints were  
322 composed of simple repeats and retrotransposons of the VIPER and L1Tc class.

323

324 These events were between 20 - 150 Kb in length and contained fragments or even complete coding  
325 sequences for surface molecule genes, such as trans-sialidases, mucins and MASP genes and  
326 surface glycoproteins (gp63/gp85). Housekeeping genes seemed to have not been affected by these  
327 genomic rearrangements. The breakpoints were composed of simple repeats, retrotransposons or  
328 both. Rearrangements affecting gene tandem arrays generated longer coding sequences by  
329 superimposing fragments - or the entire coding sequence - on genes of the same family located in a  
330 different genomic location. For instance, the Colombian isolates generated longer trans-sialidase  
331 genes by moving coding sequences from pseudomolecule 1 to pseudomolecule 8, while Texas  
332 isolates recombined trans-sialidases between pseudomolecule 16 and pseudomolecule 21. In this  
333 way, surface molecule genes were merged with another member of the same gene family - or a  
334 pseudogene - resulting in a new mosaic gene sequence (**Figure 4a**).

335

336 Retroelements could be found within or near genomic regions containing surface molecule gene  
337 tandem arrays (**Supplementary tables 2, 3 and 4**) and L1Tc fragments or their entire sequence  
338 were also included in the rearranged region in all the observed translocation spots, where they were  
339 inserted into regions containing simple repeats composed by AT dimers (**Figure 4b**).

340

341 Multiple examples of the generation of new surface molecule gene variants were identified in Tci  
342 from diverse sources. It therefore appears that the parasite uses specific molecular mechanisms of

343 recombination that can rapidly generate surface molecule diversity, allowing it to increase the  
344 genomic plasticity required to adapt to changing environments and evade immune responses  
345 during short and long-term infections in various host species.

346

347 The sizes of the tandem duplications ranged from 6 - 75 Kb and mainly involved tandem arrays  
348 coding for surface molecules, mostly trans-sialidases and mucins, but also Disperse Gene Family 1  
349 (DGF-1) and several hypothetical proteins. The breakpoints of these duplications were surrounded  
350 by simple repeats and retroelements in subtelomeric regions. A tandem duplication event could  
351 involve between four and 25 copies of a specific gene when in the subtelomeric regions, whereas in  
352 core regions the number was between two and eight. We observed that large deletions occurring in  
353 subtelomeric regions were surrounded by simple repeats of the type (T)<sub>n</sub> and (AT)<sub>n</sub> and  
354 retrotransposons of the L1Tc class, containing surface molecule gene tandem arrays. Deletions in  
355 these genomic regions tended to be shorter (4 - 12 Kb) and sample specific.

356

#### 357 **CNV distribution in the TcI clade:**

358 CNV varied extensively between strains. Most notably, among the Colombian strains, isolates  
359 derived from the same sample presented different gene copy numbers. There have been previous  
360 attempts to assess CNV in the *T. cruzi* genome<sup>27</sup>, but these studies were performed using DNA tiling  
361 microarrays with probes designed using the TcVI CL Brener strain assembly, in which subtelomeric  
362 regions are essentially absent.

363

364 The distribution of CNV in the genomes of the studied TcI samples was isolate-specific, and  
365 involved segments of an average size of 5 Kb. In the samples analysed in our study we observed  
366 blocks of segmental CNV within a chromosome with a pattern that was unique to each sample.  
367 Notably, the Colombian clones presented individual profiles of CNV (**Figure 5a** and **5b**) despite  
368 being derived from the same clinical isolates.

369

370 Sequence blocks affected by segmental CNVs contained retrotransposons of the VIPER and L1Tc  
371 class, as well as surface molecule genes surrounded by simple repeats. The isolate-specific nature of  
372 these CNV events demonstrates the high level of within-clade diversity of the TcI samples. The  
373 distribution of CNV across the *T. cruzi* genome reinforces the dynamic nature of the subtelomeric  
374 regions and the surface molecule gene families. As discussed below, it is important to note the  
375 association of structural and copy number variation with the presence of retrotransposons and  
376 simple repeats and their putative involvement in the generation of novel sequence variants via  
377 recombination.

378

379

#### 380 **DISCUSSION:**

381 Complete reconstruction of the *T. cruzi* genome to encompass the subtelomeric regions, has proved  
382 to be difficult to achieve using short reads, due to sequencing library preparation biases and a  
383 genome architecture that is rich in long stretches of simple repeats, large repetitive gene families  
384 and multiple retrotransposons. Here we have used long PacBio sequencing reads to provide the  
385 most complete genome sequence of a *T. cruzi* strain to date. This has allowed us to perform the first  
386 detailed analyses of the repertoire of complex genes families that encode cell surface molecules,  
387 considered to be involved in cell invasion and evasion of the host immune response. We have shown  
388 the duality in the organisation of the parasite genome, comprised of a core genomic component  
389 with few repetitive elements and a slow evolutionary rate, resembling that of other protozoa, and a  
390 contrasting, highly plastic subtelomeric region encoding fast evolving surface antigens, with  
391 abundant interspersed retrotransposons. The structural changes that generate and maintain  
392 diversity in *T. cruzi* surface molecules have certain mechanistic parallels in other protozoa such as  
393 those recently described in *Plasmodium falciparum*<sup>28</sup>.

394

395 Early studies of the genetic diversity of *T. cruzi* using geographically disparate sampling and  
396 restricted comparisons of genetic diversity suggested a clonal population structure<sup>29,30</sup>; however,  
397 population genetics with an expanded set of markers have now challenged this view<sup>15,31,32</sup>.  
398 Nevertheless, there are still conflicting views as to which model best describes the population  
399 structure of *T. cruzi*<sup>33,34</sup>. The newer Sylvio X10/cl1 genome sequence will now enable extensive  
400 genome-wide comparative population genomics analyses, which may shed light on this issue.  
401 Comparative analyses of 34 *T. cruzi* isolates and clones from the TcI clade suggest many  
402 recombination events and population indices, normally associated with genetic exchange between  
403 strains, are more likely to be caused by the extensive repeat-driven recombination in the  
404 subtelomeric regions. The extent of variation in the subtelomeric regions rich in surface antigen  
405 genes and the geographical clustering of strains within a region, indicates active, on-going  
406 adaptation to host and vectors. This need for phenotypic - and thus genomic - versatility may impel  
407 the active generation of sequence diversity in *T. cruzi*. Further analyses of the evolution of  
408 subtelomeric regions will yield much more detailed understanding of diversity within and between  
409 the six currently recognised genetic lineages of *T. cruzi*<sup>22</sup>.

410

411 We have shown how the genome architecture and dynamic subtelomeric regions of *T. cruzi* may  
412 provide a mechanism to generate rapidly the sequence diversity required to escape the host  
413 immune response and adapt in response to new environments. It is the striking richness in simple  
414 repeats and retrotransposons in the subtelomeric regions that renders these genomic areas  
415 susceptible to structural change, similar to yeast and other pathogens<sup>35,36,44</sup>. Retrotransposons have  
416 been associated with the generation of complexity in genomic regions in mammals and plants and  
417 with control of gene expression<sup>36,37</sup>. In the case of *T. cruzi*, they appear to generate novel variants  
418 via mechanisms that exploit sequence homology. The presence of the simple repeats and  
419 retrotransposons near surface molecule genes provides the microhomology for both mechanisms  
420 to operate in such regions. Our analysis of INDELS and chromosomal breakpoints in the



421 subtelomeric regions confirmed that a mechanism similar to NAHR or MMEJ operates as source of  
422 sequence diversity, for example by transposition of trans-sialidase genes or pseudogenes to  
423 produce new sequence mosaics. The required recombination machinery is conserved in *T. cruzi*<sup>38</sup>.  
424 Furthermore, these mechanisms would explain the high level of pseudogenisation observed in *T.*  
425 *cruzi*.

426

427 Retrotransposons were first reported from *T. cruzi* in 1991<sup>39</sup>. The presence of these elements may  
428 also partly account for the previously reported widespread observation of copy number variation in  
429 different *T. cruzi* strains<sup>27</sup>. Thus, we find that repeats near the surface molecule genes appear to  
430 drive recombination in *T. cruzi*. The apparent inability of *T. cruzi* to condense chromatin may  
431 facilitate transposition in a stochastic fashion, facilitating generation of sequence diversity in  
432 exposed regions of the genome. A similar process has been described in the neurons of higher  
433 eukaryotes<sup>40</sup> but not in any other unicellular organism. Retrotransposons may also have an  
434 important role as gene transcription regulators: they may either silence or promote gene  
435 expression, due to their susceptibility to DNA methylation or by providing potential binding sites  
436 respectively, as it has been observed in previous works<sup>41</sup>. This lack of a well-defined transcriptional  
437 regulation machinery in the *T. cruzi* genome may suggests a link to the requirement for  
438 retrotransposon closely associated with gene tandem arrays.

439

#### 440 **CONCLUSION:**

441 Here we have sequenced and assembled the complete genome of a *Trypanosoma cruzi* TcI strain.  
442 This has enabled the first resolution of the complex multiple gene families that encode *T. cruzi*  
443 surface molecules, and provided a basis for *T. cruzi* population genomics. We discover an  
444 extraordinary concentration of retrotransposons among the subtelomeric surface gene families and  
445 indications of repeat-driven recombination and generation of antigenic diversity, providing the  
446 mechanisms for *T. cruzi* to evade the host immune response, and to facilitate the adaptation to new

447 host and vectors. This genome will provide an invaluable resource to facilitate the prospective  
448 discovery of novel drug targets and vaccine candidates for Chagas disease.

449

450

451

452

453

454

455

456 **METHODS:**

457 **Genome sequencing and assembly of *Trypanosoma cruzi* DTU-I Sylvio X10/1:** Total genomic DNA  
458 from Sylvio X10/1 strain was used to produce PacBio CCS data according to the protocols from the  
459 Genomic Facility of Science for Life Laboratory, (Sweden) and Pacific Biosciences (USA). Genomic  
460 DNA was sequenced to a depth of 210X using the PacBio platform, supplying raw reads with an  
461 average length of 5.8 Kb. These reads were corrected by means of the PBcR v8.3 pipeline with the  
462 MHAP algorithm <sup>42</sup> using the auto-correction parameters described to merge haplotypes and  
463 skipping the assembly step, producing a total of 1,216 contigs (NG<sub>50</sub> = 62 Kb). Later, the assembly  
464 was scaffolded using the corrected PacBio reads with the SSPACE-Long scaffolder yielding 310  
465 scaffolds (NG<sub>50</sub> = 788 Kb); 118 gaps were filled using Illumina reads with GapFiller and corrected  
466 PacBio reads with PBJelly2. Finally, the core regions of these scaffolds were aligned against the core  
467 regions of the TcVI CL Brener reference genome using ABACAS (<http://abacas.sourceforge.net>),  
468 producing 47 pseudomolecules. The quality of the new assembly was assessed with FRC\_bam with  
469 the Illumina paired end reads.

470

471 **Annotation of the *Trypanosoma cruzi* DTU-I Sylvio X10/1 Genome:** The genome sequence was  
472 annotated using a new kinetoplastid genome annotation pipeline combining homology-based gene

473 model transfer with *de novo* gene prediction. To allow for the sensitive identification of partial  
474 genes, input sequences were split at stretches of undefined bases, effectively creating a set of  
475 'pseudocontigs', each of which does not contain any gaps. Gene finding was then performed on  
476 both the original sequences and the pseudocontigs using AUGUSTUS, which also calls partial genes  
477 at the boundaries of each pseudocontig. AUGUSTUS models were trained on 800 genes randomly  
478 sampled from the 41 Esmeraldo-type *T. cruzi* CL Brener chromosomes in GeneDB. Protein-DNA  
479 alignments of reference proteins against the new *T. cruzi* sequences, generated using Exonerate,  
480 were used as additional hints to improve the accuracy of the gene prediction. In addition, the RATT  
481 software was used to transfer highly conserved gene models from the *T. cruzi* CL Brener annotation  
482 to the target. A non-redundant set of gene models was obtained by merging the results of both  
483 RATT and AUGUSTUS and, for each maximal overlapping set of gene models, selecting the non-  
484 overlapping subset that maximizes the total length of the interval covered by the models, weighted  
485 by varying levels of *a priori* assigned confidence. Spurious low-confidence protein coding genes with  
486 a reading direction in disagreement with the directions of the polycistronic transcriptional units  
487 were removed automatically. The result of this integration process was then merged with ncRNA  
488 annotations produced by specific tools such as ARAGORN and Infernal. Finally, protein-DNA  
489 alignments with frame shifts produced by LAST were used in a computational approach to identify  
490 potential pseudogenes in the remaining sequence.

491

492 Downstream of the structural annotation phase, gene models were automatically assigned IDs and  
493 further extended with product descriptions and GO terms, both transferred from CL Brener  
494 orthologs and inferred from Pfam protein domain hits and represented as feature attributes or  
495 Sequence Ontology-typed subfeatures tagged with appropriate evidence codes. This annotation  
496 pipeline has been implemented in the Companion web server. The assembled genome was scanned  
497 for small RNAs using INFERNAL against the curated RFAM database using cmsearch with a  
498 minimum e-value of  $1e-10$ , a GC-bias of 0 and a minimum alignment length of 10 nt. This annotation

499 process has been implemented into the web-based annotation pipeline COMPANION<sup>43</sup> from the  
500 Wellcome Trust Sanger Institute.

501

502 Repetitive sequences were annotated using RepeatMasker with the NCBI+ search engine and  
503 LTRHarvest. Using the genomic coordinates of the repetitive elements, the genome was split in  
504 windows of 10 Kb to identify VIPER and L1Tc retroelements adjacent to surface molecule genes (i.e:  
505 trans-sialidases, mucins and MASP). A one-sided Fisher's exact test was used to evaluate if the  
506 retroelements were enriched in genomic segments containing surface molecule genes.

507

508 **Identification of SNPs and Indels:** An improved short-read mapping strategy was used to assign  
509 the reads to their target sequences with high accuracy, especially in regions rich in simple and low  
510 complexity repeats, by taking advantage of the statistical read placement implemented in the  
511 Stampy read mapper to accurately call genomic variants from the mapped reads. Reads from all *T.*  
512 *cruzi* TcI isolates were mapped against the assembled *T. cruzi* Sylvio X10/1 genome using a two-step  
513 mapping process to improve the mapping of Illumina data to highly repetitive regions: First, reads  
514 were mapped using BWA MEM with default parameters; later, the BAM file produced by BWA was  
515 remapped with Stampy (v1.23) using the `--bamkeepgoodreads` option. The final mapping file was  
516 sorted and filtered for PCR duplicates using Picard Tools v1.137. Variants were called using  
517 FreeBayes with a minimum per-base quality of 30, minimum mapping quality of 30 and minimum  
518 coverage of 15 bases. Variants that were found in a potentially misassembled region were excluded  
519 from the analysis. Additionally, genomic variants were called using FermiKit - which is an  
520 assembly-based variant caller - to validate the genomic variants observed in subtelomeric  
521 regions. A consensus of the two methods was used as a final set of variants for downstream  
522 analyses. Haplotypes were phased using Beagle r1399. The phased markers were used for  
523 downstream analyses with SNPrelate and VCFtools and the functional effect of the identified  
524 variants was predicted using SnpEff.

525

526 **Identification of genomic structural variants:** Genomic structural variants (SV) were identified  
527 using a consensus of different methods: Delly2, Lumpy, FermiKit and FindTranslocations  
528 (<https://github.com/vezzi/FindTranslocations.git>) using both raw reads and realigned BAM files. For  
529 each method, a SV muts had a depth of coverage > 10 reads and a mapping quality of > 30. Later, a  
530 consensus was created with all the SV that were supported by all the methods. SVs that were  
531 supported by FermiKit and at least one of the mapping-based methods were also included but  
532 labelled as 'Low Confidence'. SVs identified by only one method were not included. Breakpoint  
533 analysis was done with custom Python scripts and their functional effect was predicted using  
534 SNPeff. Analysis of copy number variation (CNV) were done using the BAM files for each sample  
535 with the *Control-FREEC* package.

536

537 **Accessions:** Whole genome sequence Genbank accession: ADWP00000000 (CP015651-CP015697).  
538 Reads for the 34 TcI isolates SRA accession: SRP076682.

539

540 **Authors contributions:** CT-L and BA conceived and designed the study. CT-L designed and  
541 executed computational analyses. MY prepared Sylvio X10/cl1 genomic DNA for PacBio sequencing  
542 and performed manual annotation of surface molecule genes. JEC, AS, JDR, FG, SO-M, JAC, SMRT,  
543 HC, RG, KJ, MEB, PJH, KOM, MJG, BB provided genomic DNA for TcI isolates. JLR-C and DCB  
544 created chromosome maps for surface molecules. MAM, LAM, ML and ECG contributed to the  
545 interpretation of the results. CT-L, BA, MAM wrote the manuscript. All authors read and approved  
546 the final version of the manuscript.

547

548 **Acknowledgements:** The authors wish to thank to John Kuijpers and Lawrence Hon from  
549 Pacific Biosciences (PacBio) for providing the data for the TcI Sylvio X10/cl1 genome and  
550 preliminary assembly results. We would also like to acknowledge Eric Dumonteil, University

551 of the Yucatan, Mexico, and Ed Wozniak, Texas Department of State Health Services, for  
552 past work on parasite collection. This research was funded by grants from the Knut and Alice  
553 Wallenberg Foundation, The Swedish Research Council and the European FP7 program.  
554 LAM was funded by a grant from the NIH.

555

556

557 **TABLES:**

558

559 **Table 1: *Trypanosoma cruzi* DTU-I Sylvio X10/1 genome assembly**

| Metric                       | Value    |
|------------------------------|----------|
| Number of scaffolds          | 47       |
| Assembly size                | 41.3 Mbp |
| Percentage of reconstruction | 98.5     |
| Longest scaffold             | 3.1 Mbp  |
| Shortest scaffold            | 404 Kb   |
| NG50                         | 1.0 Mbp  |
| N50                          | 1.1 Mbp  |

560

561

562 **Table 2: Genomic variants identified in the sequenced TcI isolates**

| GROUP        | SNPs   | INDELS | DELETION | DUPLICATION | TRANSLOCATION |
|--------------|--------|--------|----------|-------------|---------------|
| Colombia*    | 158565 | 59520  | 439      | 1231        | 4140          |
| Colombiana** | 105023 | 30697  | 23       | 86          | 273           |
| Venezuela    | 77232  | 70086  | 43       | 183         | 614           |
| Ecuador      | 122122 | 84201  | 40       | 164         | 354           |
| Panama       | 620499 | 238833 | 225      | 605         | 2060          |
| Texas        | 101771 | 78499  | 69       | 303         | 978           |

563 \* - FcHc and CG clones from Colombia

564 \*\* - Tcl Colombiana strain

565

566

567

568

569

570 **Table 3:** Patterns of INDELS and their associated mechanisms of origin.

| INDEL type     | Example                                          | Mechanism | Frequency* |
|----------------|--------------------------------------------------|-----------|------------|
| HR - deletion  | GCATAAA <del>aa</del> AAAGC                      | NAHR      | 756 411    |
| HR - insertion | CACA <del>AAAAAAAAAAAA</del> GCTAC               | NAHR      | 521 002    |
| TR - mixed     | ACACAC <del>aca</del> ACACAC <del>AC</del> AC    | NAHR      | 118 432    |
| Non-repetitive | TAGCAC <del>agt</del> GACTTCACAG <del>CCTG</del> | NHEJ      | 28 389     |
| Long Insertion | <del>C</del> <del>GGCTAGACCAGGTACAGTCA</del>     | MMEJ      | 32 666     |
| Long Deletion  | GC <del>cactgacacgacactgacacactgaa</del> A       | MMEJ      | 31 712     |

571

572 HR = Homopolymer run

573 TR = Tandem Repeat

574  = Deletion

575  = Insertion

576 \* For all the 34 Tcl genomes compared against Sylvio X10/cl1

577

578

579

580

581

582

583

584

585

586

587

588

589

590

591 **Supplementary table 1:** Samples used in this study

| Sample      | Country   | Source                  | Chagas'      | Seq. Coverage |
|-------------|-----------|-------------------------|--------------|---------------|
| H1a         | Panama    | Human                   | Chronic      | 31 X          |
| H2          | Panama    | Human                   | Asymptomatic | 28 X          |
| H3          | Panama    | Human                   | Asymptomatic | 32 X          |
| H4          | Panama    | Human                   | No Disease   | 29 X          |
| H5          | Panama    | Human                   | Chronic      | 31 X          |
| H6          | Panama    | Human                   | Asymptomatic | 31 X          |
| H7          | Panama    | Human                   | Asymptomatic | 28 X          |
| H8          | Panama    | Human                   | No Disease   | 32 X          |
| H12         | Panama    | Human                   | No Disease   | 31 X          |
| H14         | Panama    | Human                   | Chronic      | 32 X          |
| H15         | Panama    | Human                   | Chronic      | 31 X          |
| V1          | Panama    | <i>P. geniculatus</i>   | NA           | 28 X          |
| V2          | Panama    | <i>R. pallescens</i>    | NA           | 25 X          |
| V3          | Panama    | <i>T. dimidiata</i>     | NA           | 28 X          |
| TBM3324     | Ecuador   | <i>R. ecuadoriensis</i> | NA           | 28 X          |
| TBM3406B1   | Ecuador   | <i>R. ecuadoriensis</i> | NA           | 25 X          |
| TBM3479B1   | Ecuador   | <i>R. ecuadoriensis</i> | NA           | 29 X          |
| TBM3519W1   | Ecuador   | <i>R. ecuadoriensis</i> | NA           | 28 X          |
| X10462-P1C9 | Venezuela | Human                   | NA           | 31 X          |
| X12422-P1C3 | Venezuela | Human                   | NA           | 29 X          |



|            |          |                     |                    |      |
|------------|----------|---------------------|--------------------|------|
| Colombiana | Colombia | Human               | NA                 | 30 X |
| CGl10      | Colombia | Human               | Acute Co-infection | 30 X |
| CGl11      | Colombia | Human               | Acute Co-infection | 30 X |
| CGl12      | Colombia | Human               | Acute Co-infection | 30 X |
| CGl13      | Colombia | Human               | Acute Co-infection | 30 X |
| CGl14      | Colombia | Human               | Acute Co-infection | 30 X |
| CGl15      | Colombia | Human               | Acute Co-infection | 30 X |
| FcHcl1     | Colombia | Human               | Acute Oral         | 30 X |
| FcHcl2     | Colombia | Human               | Acute Oral         | 30 X |
| FcHcl3     | Colombia | Human               | Acute Oral         | 30 X |
| FcHcl4     | Colombia | Human               | Acute Oral         | 30 X |
| FcHcl5     | Colombia | Human               | Acute Oral         | 30 X |
| H1b        | Mexico   | Human               | Acute              | 32 X |
| TD23       | Texas    | <i>T. dimidiata</i> | NA                 | 30 X |
| TD25       | Texas    | <i>T. dimidiata</i> | NA                 | 30 X |

592

593 NA = Not applicable

594

595

596

597

598

599

600

601

602

603

604

605

606

607

608

609

610

611

612

613 **FIGURE LEGENDS:**

614 **Figure 1:** a) Comparison of chromosome 15 from the TcVI CL Brener and TcI Sylvio X10/cl1  
615 assemblies. Grey lines between pseudomolecules represent regions of synteny between  
616 orthologous genes, and yellow blocks represent gaps in both genome assemblies. Coloured blocks  
617 represent paralogs of multicopy gene families. b) Distribution of surface molecule gene tandem  
618 arrays in the 47 chromosomes of the TcI Sylvio X10/cl1 genome.

619

620 **Figure 2:** a) Bayesian principal component analysis (PCA) of *T. cruzi* DTU-I strains using INDELs and  
621 b) Identity by Descent (IBD) dendrogram of *T. cruzi* DTU-I strains using SNPs. Both analysis, using  
622 different markers, support the population structure of the analysed TcI samples. Notably, the highly  
623 virulent TcI Colombiana and the Panamanian TcI H1 from a chronic patient are presented as outliers  
624 (b, far left).

625

626 **Figure 3:** a) Linkage disequilibrium matrix ( $r^2$ ) of chromosome 2 for the Colombian CG and FcHc  
627 clones. LD values range from 0 (recombination) to 1 (no recombination). b) Genome-wide *Fst*  
628 distribution in 10 Kb bins displaying a state of panmixia for the CG clones and moderate genetic  
629 differentiation in the FcHc clones, yellow dots represent outlier bins. c) Distribution of subtelomeric  
630 *Tajima's D* selection test in both groups displaying overall balancing selection ( $D > 0$ ) in these  
631 regions for both clones.

632

633 **Figure 4:** a) Proposed mechanism of inter-chromosomal recombination between gene tandem  
634 arrays for the generation of antigenic diversity. Here, VIPER retrotransposons (green) are  
635 surrounding a tandem array, shown in the direction of transcripton, containing trans-sialidases  
636 (blue) and pseudogenes (red) in pseudomolecules 1 and 8. The rearranged tandem array is shown  
637 below displaying the merger of genes and pseudogenes to form a longer coding sequence. b) Detail  
638 of simple repeats and retrotransposons within a trans-sialidase tandem array in pseudomolecule 1.  
639

640 **Figure 5:** Distribution of CNV changes in chromosome 3 of the Colombian a) CG clones and b) FcHc  
641 clones. Black lines represent the reference genome sequence and cyan lines represent the sample  
642 under study. Each sliding window for CNV evaluation is represented as a dot. A drastic change in  
643 CNV can be noted in the FcHc clones whereas the CG clones seem to be less affected.  
644

645 **Supplementary figure 1:** Distribution of coverage for a) PacBio and b) Illumina reads in a  
646 subtelomeric end on chromosome 8 showing a well supported genome assembly of these  
647 regions.  
648

649 **Supplementary figure 2:** Genome-wide Neighbour Joining tree for trans-sialidases genes  
650 from the Sylvio X10/cl1 genome showing the high level of sequence diversity for these gene  
651 family.  
652

653 **Supplementary figure 3:** Principal component variability for the genotype diversity of the 34  
654 TcI isolates.  
655  
656  
657  
658  
659

660

661

662

663

664

665 **References:**

- 666 1. GBD 2013 Mortality and Causes of Death Collaborators. Global, regional, and national age-sex  
667 specific all-cause and cause-specific mortality for 240 causes of death, 1990-2013: a systematic  
668 analysis for the Global Burden of Disease Study 2013. *Lancet* **385**, 117–171 (2015).
- 669 2. WHO | 6 February 2015, vol. 90, 6 (pp. 33–44). (2015).
- 670 3. Garcia, M. N. *et al.* Evidence of autochthonous Chagas disease in southeastern Texas. *Am. J.*  
671 *Trop. Med. Hyg.* **92**, 325–330 (2015).
- 672 4. Bern, C. Chagas' Disease. *N. Engl. J. Med.* **373**, 456–466 (2015).
- 673 5. Rassi, A., Rassi, A. & Marin-Neto, J. A. Chagas disease. *Lancet* **375**, 1388–1402 (2010).
- 674 6. Morillo, C. A. *et al.* Randomized Trial of Benznidazole for Chronic Chagas' Cardiomyopathy. *N.*  
675 *Engl. J. Med.* **373**, 1295–1306 (2015).
- 676 7. Pecoul, B. *et al.* The BENEFIT Trial: Where Do We Go from Here? *PLoS Negl. Trop. Dis.* **10**,  
677 e0004343 (2016).
- 678 8. Osorio, L., Ríos, I., Gutiérrez, B. & González, J. Virulence factors of *Trypanosoma cruzi*: who is  
679 who? *Microbes Infect.* **14**, 1390–1402 (2012).
- 680 9. El-Sayed, N. M. *et al.* The genome sequence of *Trypanosoma cruzi*, etiologic agent of Chagas  
681 disease. *Science* **309**, 409–415 (2005).
- 682 10. Weatherly, D. B., Boehlke, C. & Tarleton, R. L. Chromosome level assembly of the hybrid  
683 *Trypanosoma cruzi* genome. *BMC Genomics* **10**, 255 (2009).
- 684 11. Franzén, O. *et al.* Shotgun sequencing analysis of *Trypanosoma cruzi* I Sylvio X10/1 and  
685 comparison with T. cruzi VI CL Brener. *PLoS Negl. Trop. Dis.* **5**, e984 (2011).

- 686 12. Franzén, O. *et al.* Comparative genomic analysis of human infective *Trypanosoma cruzi*  
687 lineages with the bat-restricted subspecies *T. cruzi marinkellei*. *BMC Genomics* **13**, 531 (2012).
- 688 13. Kim, D. *et al.* Telomere and subtelomere of *Trypanosoma cruzi* chromosomes are enriched in  
689 (pseudo)genes of retrotransposon hot spot and trans-sialidase-like gene families: the origins of  
690 *T. cruzi* telomeres. *Gene* **346**, 153–161 (2005).
- 691 14. Zingales, B. *et al.* The revised *Trypanosoma cruzi* subspecific nomenclature: rationale,  
692 epidemiological relevance and research applications. *Infect. Genet. Evol.* **12**, 240–253 (2012).
- 693 15. Llewellyn, M. S. *et al.* Genome-scale multilocus microsatellite typing of *Trypanosoma cruzi*  
694 discrete typing unit I reveals phylogeographic structure and specific genotypes linked to  
695 human infection. *PLoS Pathog.* **5**, e1000410 (2009).
- 696 16. Ramírez, J. D. *et al.* Chagas cardiomyopathy manifestations and *Trypanosoma cruzi* genotypes  
697 circulating in chronic Chagasic patients. *PLoS Negl. Trop. Dis.* **4**, e899 (2010).
- 698 17. Montgomery, S. P., Starr, M. C., Cantey, P. T., Edwards, M. S. & Meymandi, S. K. Neglected  
699 parasitic infections in the United States: Chagas disease. *Am. J. Trop. Med. Hyg.* **90**, 814–818  
700 (2014).
- 701 18. Bern, C., Kjos, S., Yabsley, M. J. & Montgomery, S. P. *Trypanosoma cruzi* and Chagas' Disease  
702 in the United States. *Clin. Microbiol. Rev.* **24**, 655–681 (2011).
- 703 19. Faulkner, G. J. *et al.* The regulated retrotransposon transcriptome of mammalian cells. *Nat.*  
704 *Genet.* **41**, 563–571 (2009).
- 705 20. Claessens, A. *et al.* Generation of antigenic diversity in *Plasmodium falciparum* by structured  
706 rearrangement of Var genes during mitosis. *PLoS Genet.* **10**, e1004812 (2014).
- 707 21. Hall, J. P. J., Wang, H. & Barry, J. D. Mosaic VSGs and the scale of *Trypanosoma brucei*  
708 antigenic variation. *PLoS Pathog.* **9**, e1003502 (2013).
- 709 22. Andersson, B. The *Trypanosoma cruzi* genome; conserved core genes and extremely variable  
710 surface molecule families. *Res. Microbiol.* **162**, 619–625 (2011).
- 711 23. Guhl, F. & Ramírez, J. D. *Trypanosoma cruzi* I diversity: towards the need of genetic

- 712 subdivision? *Acta Trop.* **119**, 1–4 (2011).
- 713 24. Parks, M. M., Lawrence, C. E. & Raphael, B. J. Detecting non-allelic homologous recombination  
714 from high-throughput sequencing data. *Genome Biol.* **16**, 72 (2015).
- 715 25. Sfeir, A. & Symington, L. S. Microhomology-Mediated End Joining: A Back-up Survival  
716 Mechanism or Dedicated Pathway? *Trends Biochem. Sci.* **40**, 701–714 (2015).
- 717 26. Weckselblatt, B., Hermetz, K. E. & Rudd, M. K. Unbalanced translocations arise from diverse  
718 mutational mechanisms including chromothripsis. *Genome Res.* **25**, 937–947 (2015).
- 719 27. Minning, T. a., Weatherly, D. B., Flibotte, S. & Tarleton, R. L. Widespread, focal copy number  
720 variations (CNV) and whole chromosome aneuploidies in *Trypanosoma cruzi* strains revealed  
721 by array comparative genomic hybridization. *BMC Genomics* **12**, 139 (2011).
- 722 28. Miles, A. *et al.* Indels, structural variation, and recombination drive genomic diversity in  
723 *Plasmodium falciparum*. *Genome Res.* **26**, 1288–1299 (2016).
- 724 29. Tibayrenc, M., Kjellberg, F. & Ayala, F. J. A clonal theory of parasitic protozoa: the population  
725 structures of *Entamoeba*, *Giardia*, *Leishmania*, *Naegleria*, *Plasmodium*, *Trichomonas*, and  
726 *Trypanosoma* and their medical and taxonomical consequences. *Proc. Natl. Acad. Sci. U. S. A.*  
727 **87**, 2414–2418 (1990).
- 728 30. Tibayrenc, M. & Ayala, F. J. Towards a population genetics of microorganisms: The clonal  
729 theory of parasitic protozoa. *Parasitol. Today* **7**, 228–232 (1991).
- 730 31. Gaunt, M. W., Yeo, M., Frame, I. A. & Stothard, J. R. Mechanism of genetic exchange in  
731 American trypanosomes. **421**, (2003).
- 732 32. Westenberger, S. J., Barnabé, C., Campbell, D. a. & Sturm, N. R. Two hybridization events  
733 define the population structure of *Trypanosoma cruzi*. *Genetics* **171**, 527–543 (2005).
- 734 33. Tibayrenc, M. & Ayala, F. J. The population genetics of *Trypanosoma cruzi* revisited in the light  
735 of the predominant clonal evolution model. *Acta Trop.* **151**, 156–165 (2015).
- 736 34. Messenger, L. A. & Miles, M. A. Evidence and importance of genetic exchange among field  
737 populations of *Trypanosoma cruzi*. *Acta Trop.* **151**, 150–155 (2015).

- 738 35. Aksenova, A. Y. *et al.* Genome rearrangements caused by interstitial telomeric sequences in  
739 yeast. *Proc. Natl. Acad. Sci. U. S. A.* **110**, 19866–19871 (2013).
- 740 36. de Jonge, R. *et al.* Extensive chromosomal reshuffling drives evolution of virulence in an  
741 asexual pathogen. *Genome Res.* **23**, 1271–1282 (2013).
- 742 37. McConnell, M. J. *et al.* Mosaic copy number variation in human neurons. *Science* **342**, 632–637  
743 (2013).
- 744 38. Ramesh, M. A., Malik, S.-B. & Logsdon, J. M., Jr. A Phylogenomic Inventory of Meiotic Genes:  
745 Evidence for Sex in Giardia and an Early Eukaryotic Origin of Meiosis. *Curr. Biol.* **15**, 185–191  
746 (2005).
- 747 39. Villanueva, M. S., Williams, S. P., Beard, C. B., Richards, F. F. & Aksoy, S. A new member of a  
748 family of site-specific retrotransposons is present in the spliced leader RNA genes of  
749 *Trypanosoma cruzi*. *Mol. Cell. Biol.* **11**, 6139–6148 (1991).
- 750 40. Erwin, J. A., Marchetto, M. C. & Gage, F. H. Mobile DNA elements in the generation of diversity  
751 and complexity in the brain. *Nat. Rev. Neurosci.* **15**, 497–506 (2014).
- 752 41. Elbarbary, R. A., Lucas, B. A. & Maquat, L. E. Retrotransposons as regulators of gene  
753 expression. *Science* **351**, aac7247 (2016).
- 754 42. Berlin, K. *et al.* Assembling large genomes with single-molecule sequencing and locality-  
755 sensitive hashing. *Nat. Biotechnol.* 1–11 (2015).
- 756 43. Steinbiss, S. *et al.* Companion: a web server for annotation and analysis of parasite genomes.  
757 *Nucleic Acids Res.* **44**, W29–34 (2016).
- 758 44. Faino, L. *et al.* Transposons actively and passively contributes to the evolution of the two-speed  
759 genome of a fungal pathogen. *Genome Res.* **26**: 1091 – 1100 (2016).

760  
761  
762  
763  
764

765

766



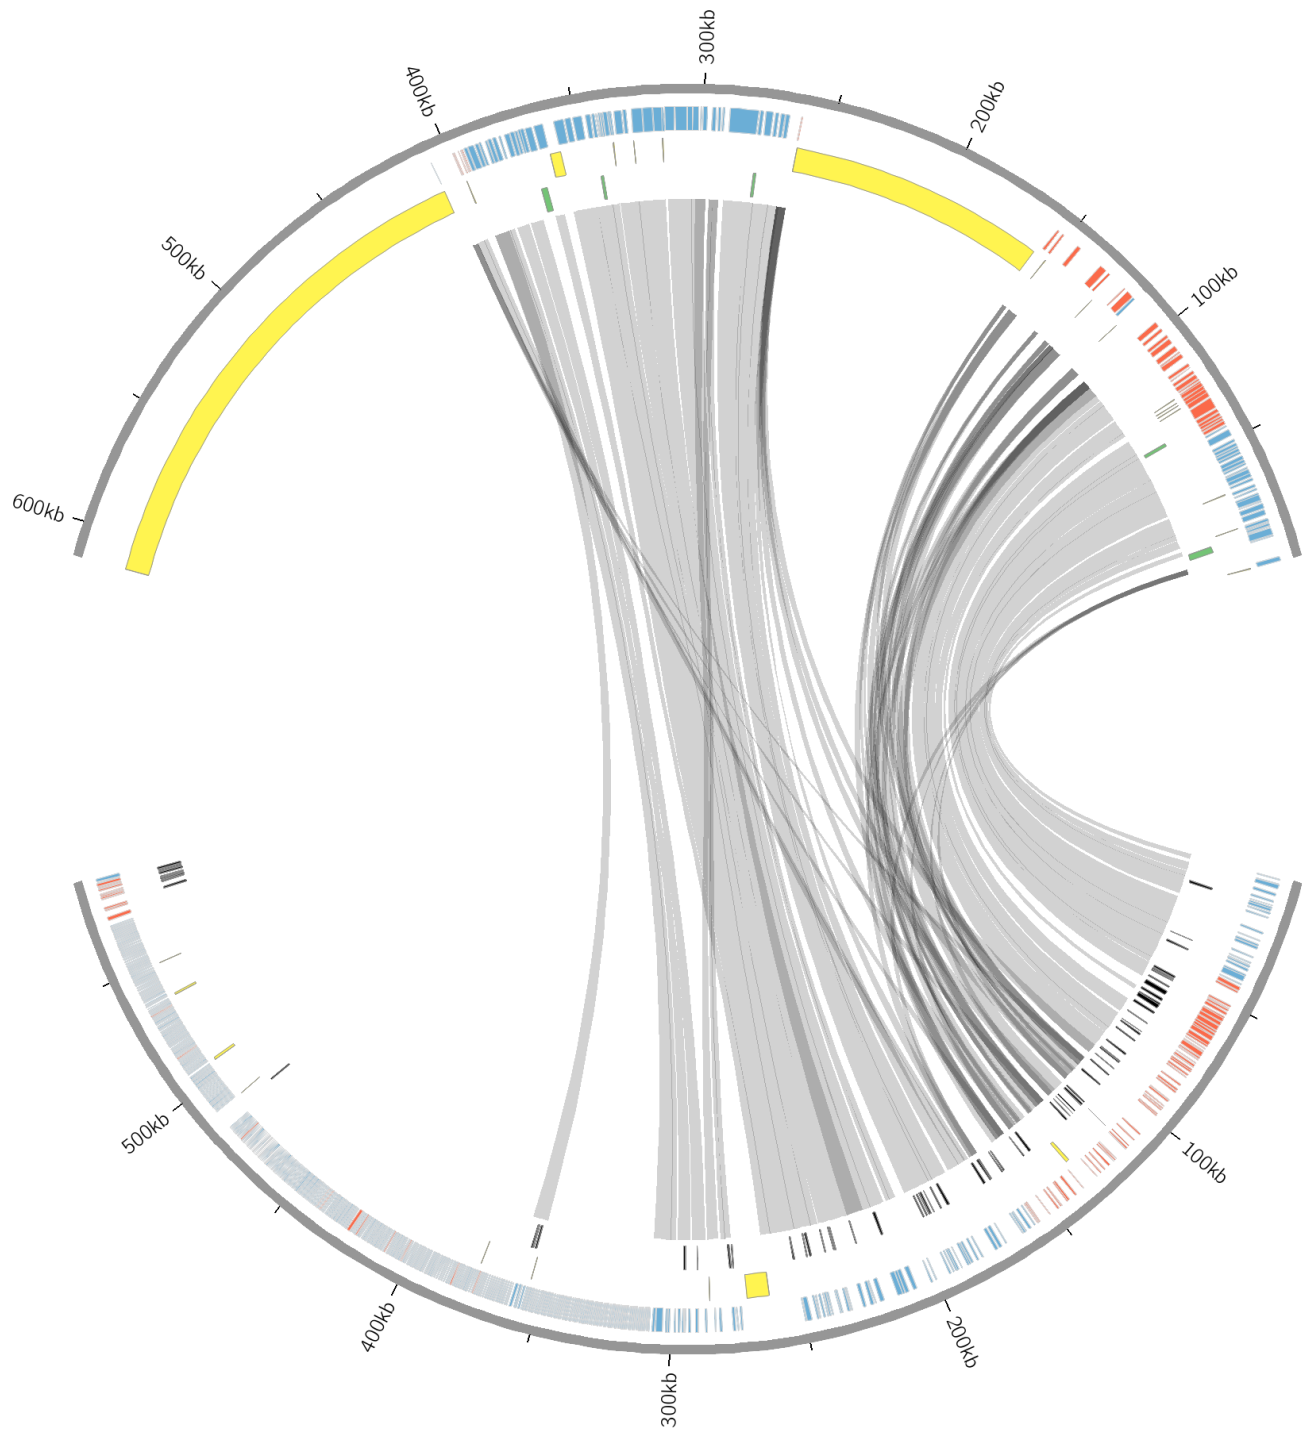

TcI Chr15

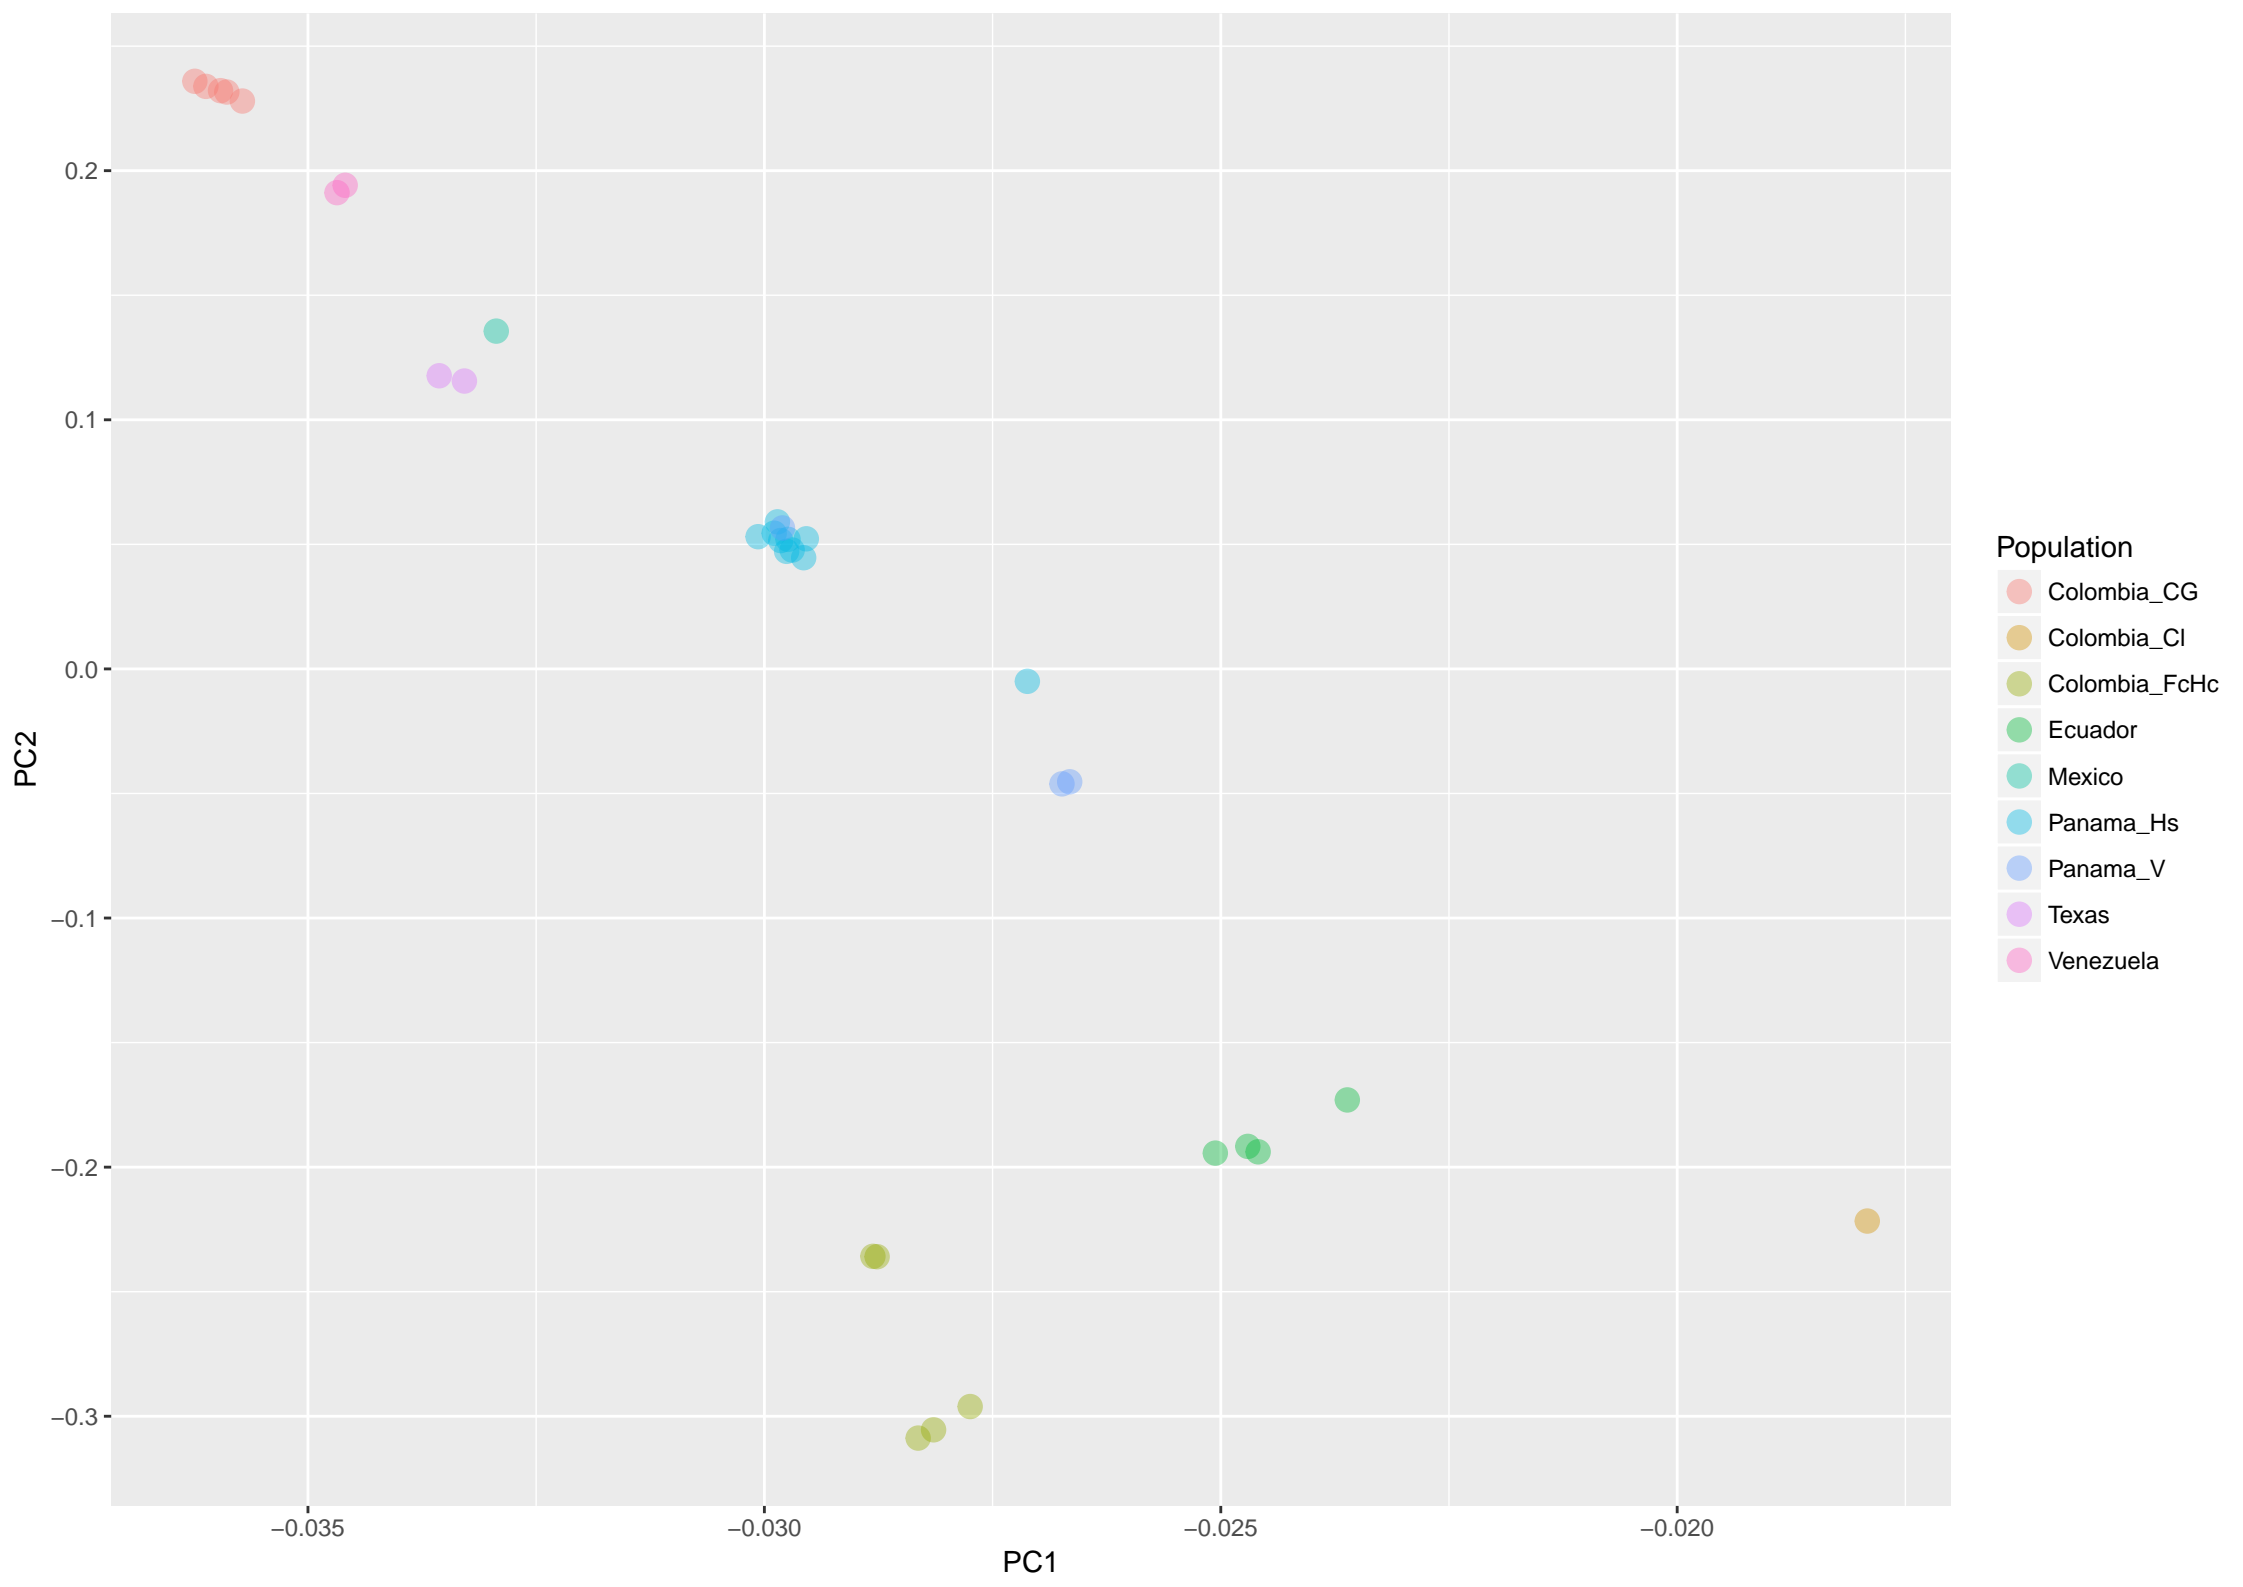

# Trypanosoma cruzi TcI IBD Clustering

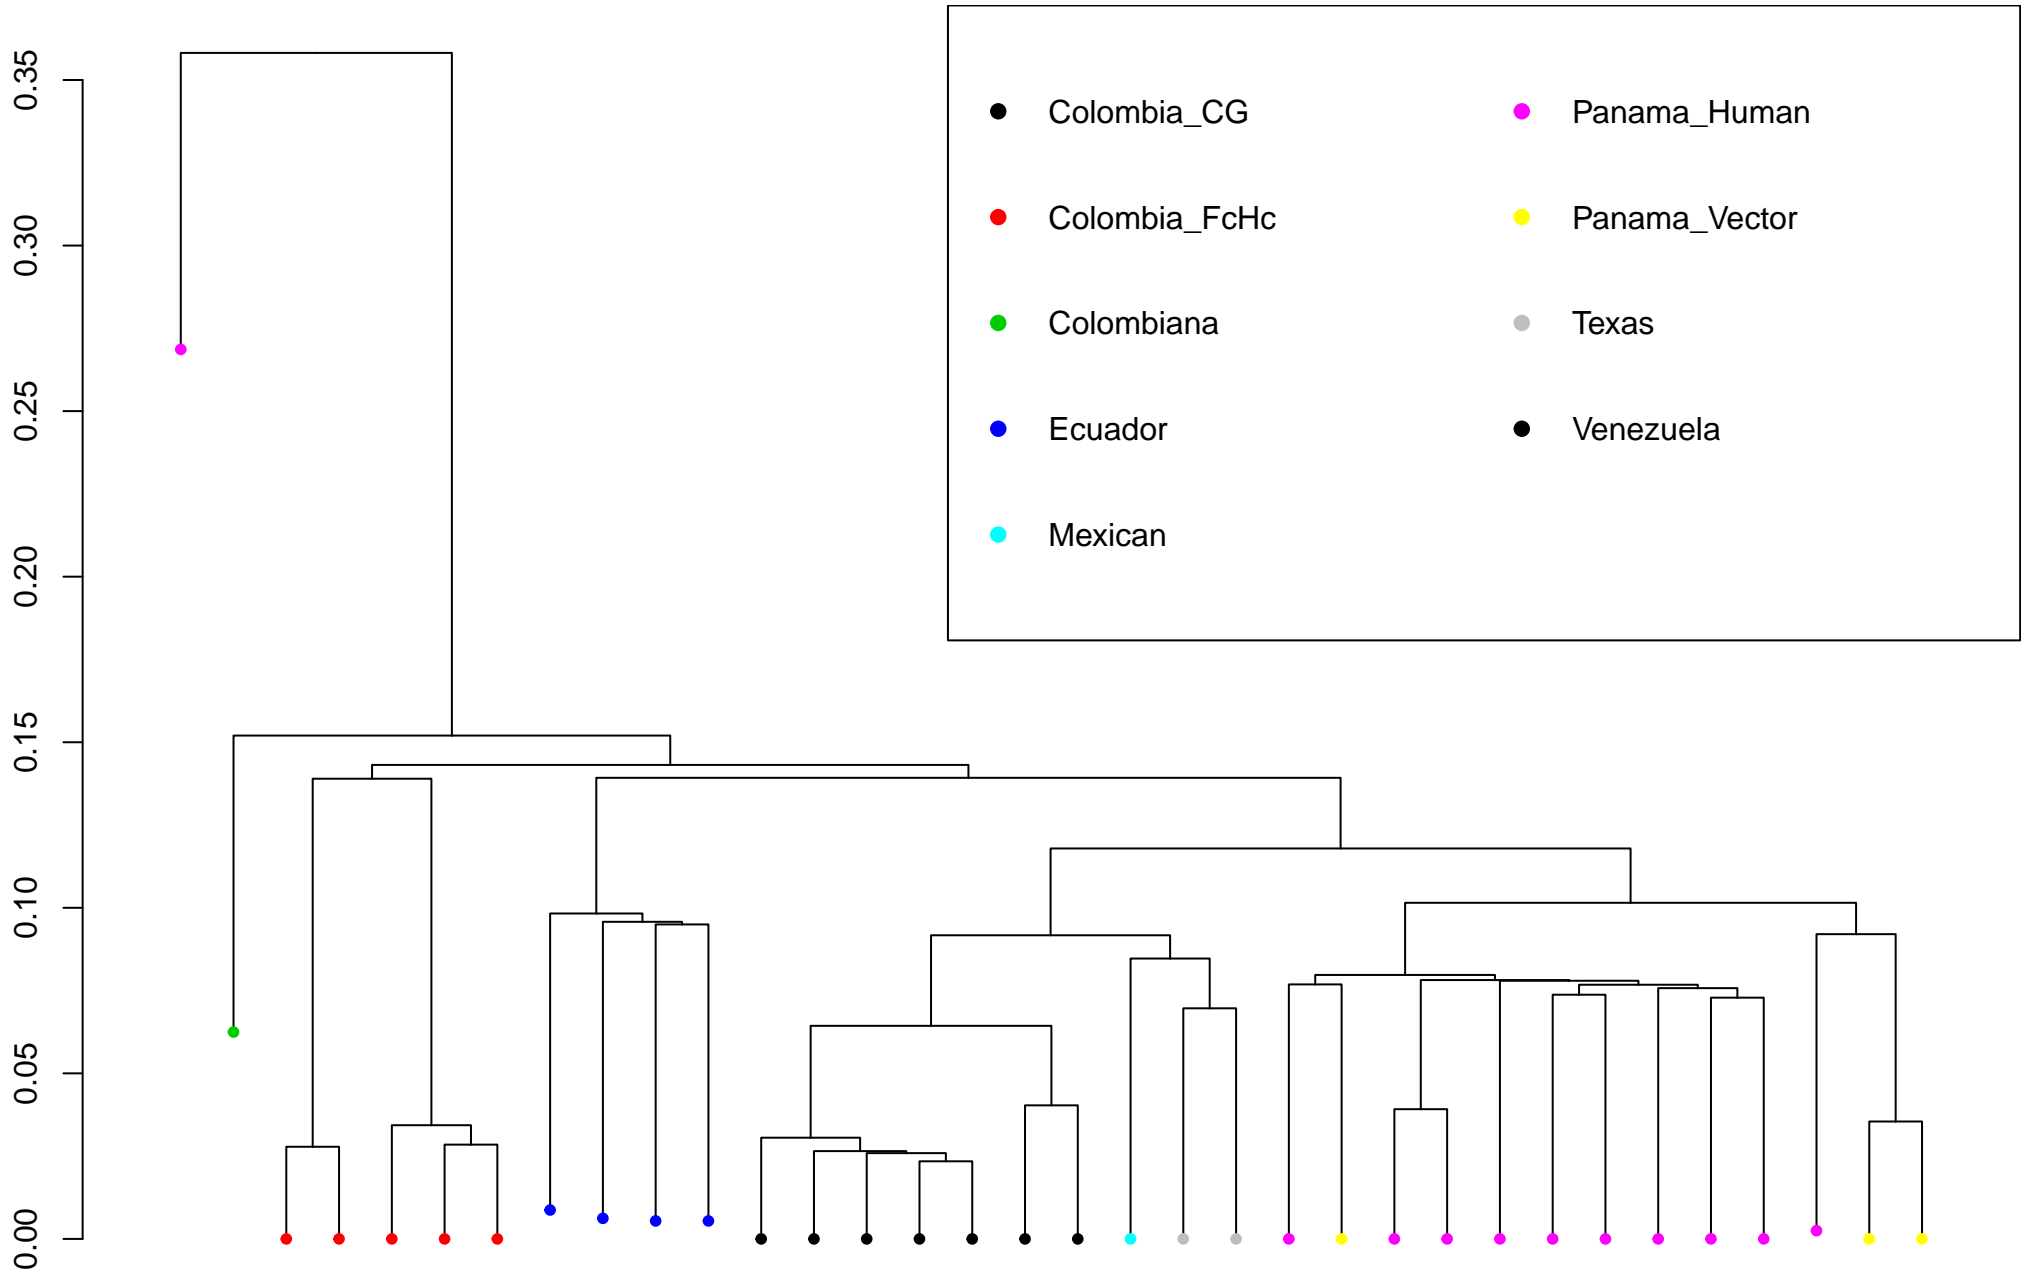

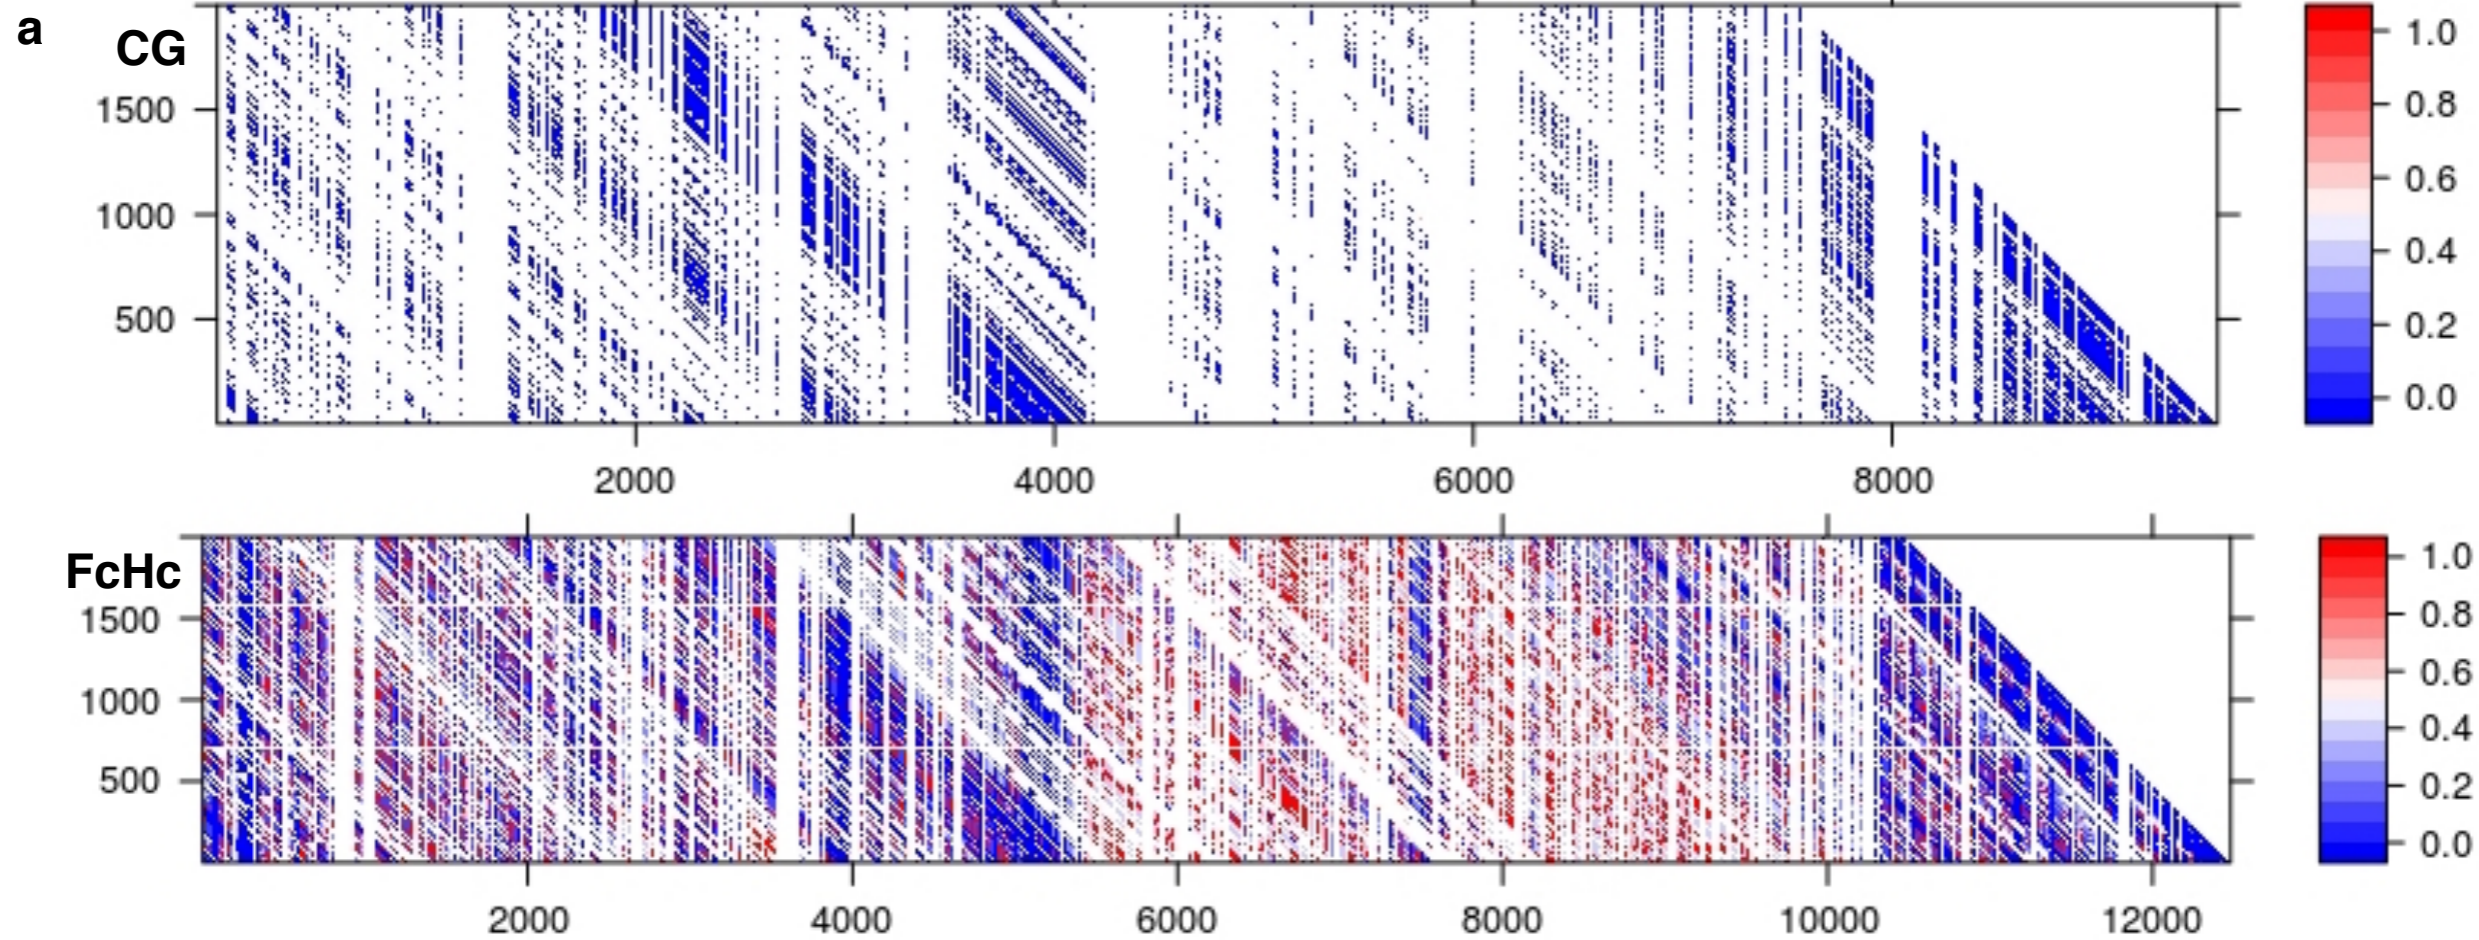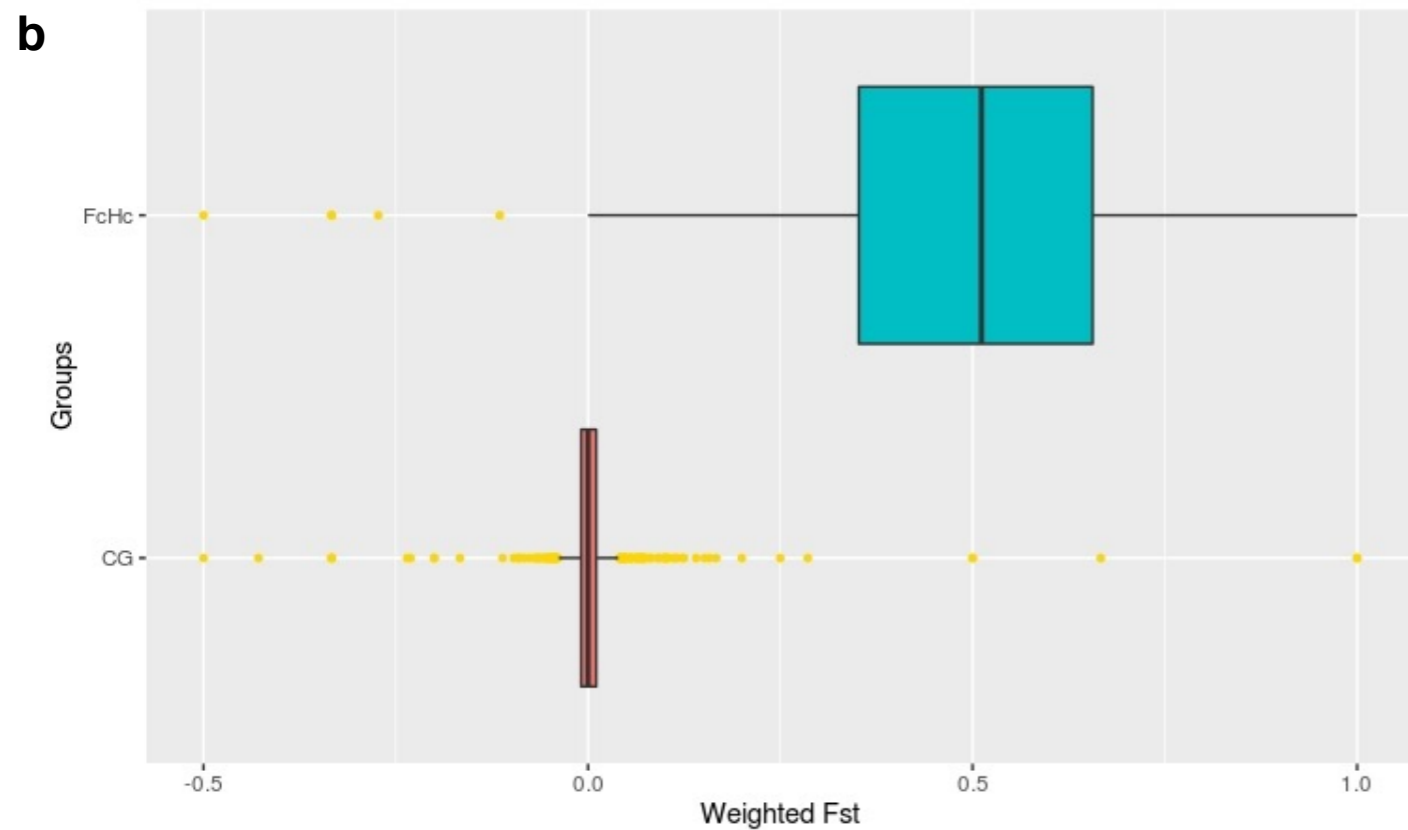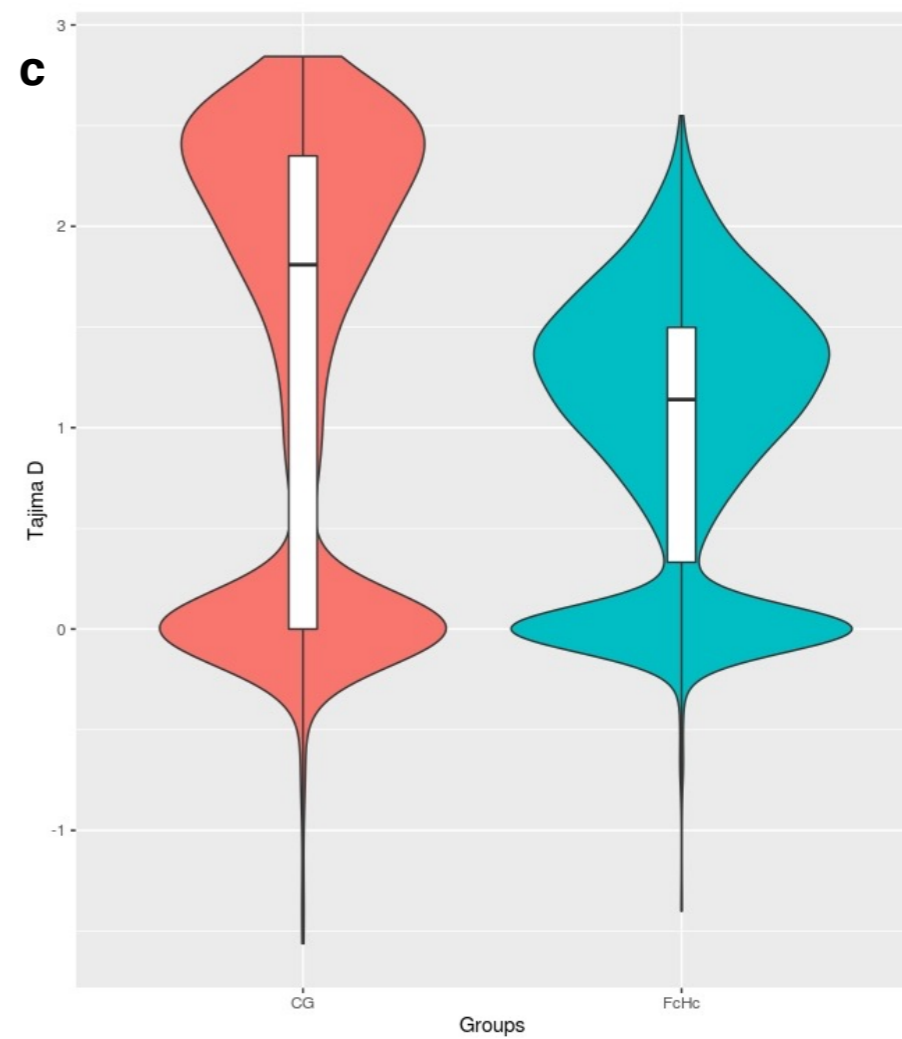

**a**

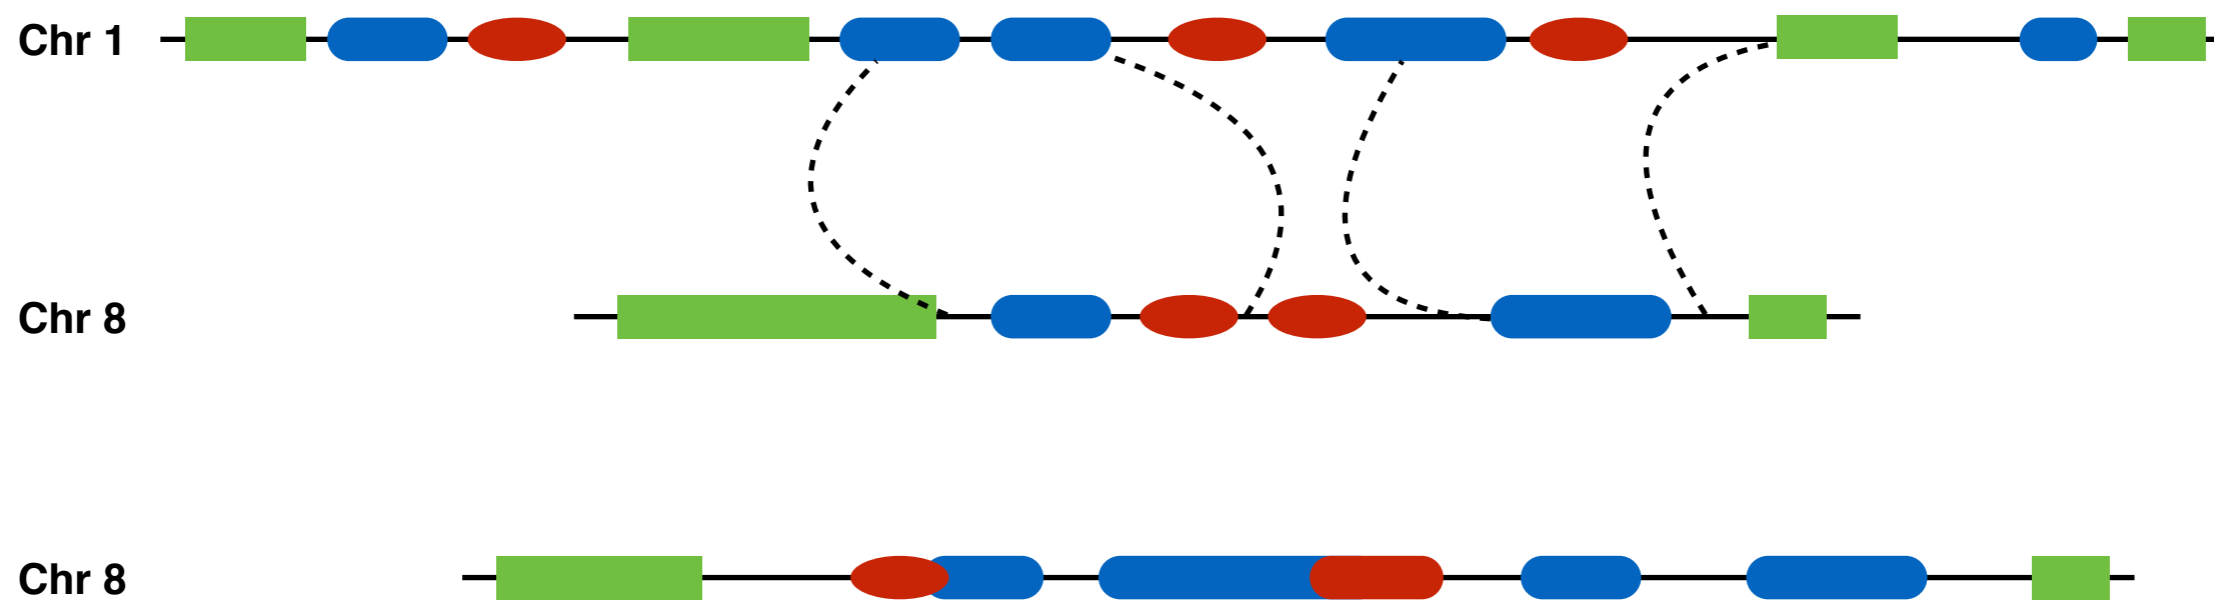

**b**

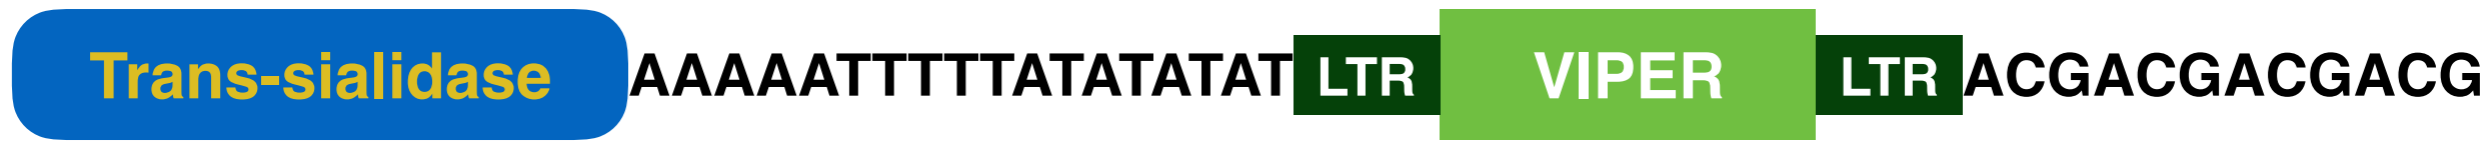

# Distribution of CNV in chromosome 3 of the Colombian CG clones

## CGI10

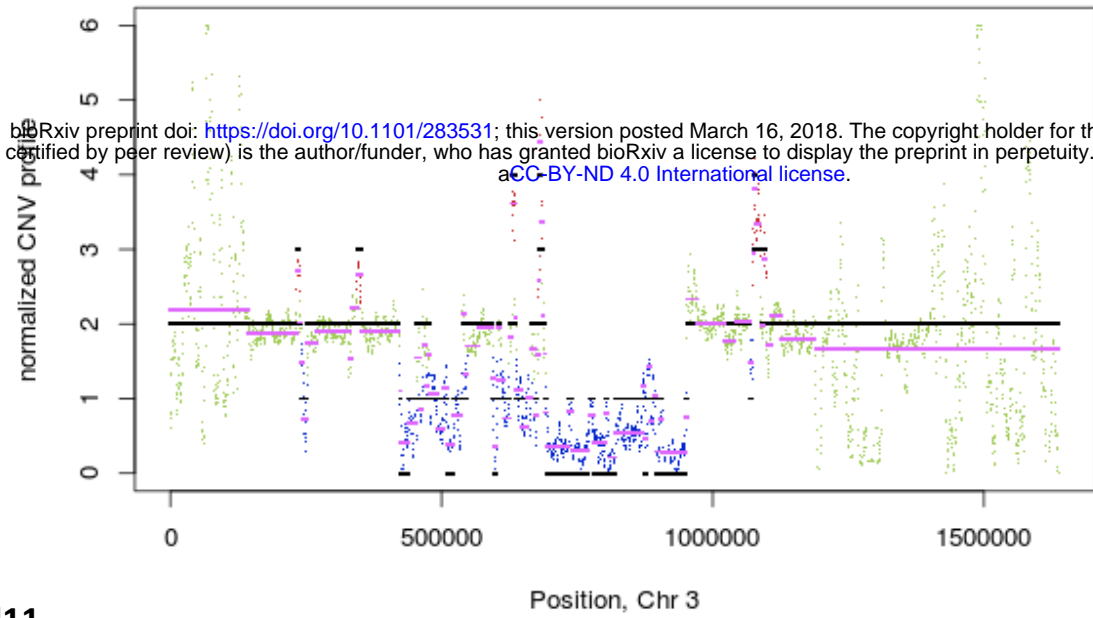

## CGI11

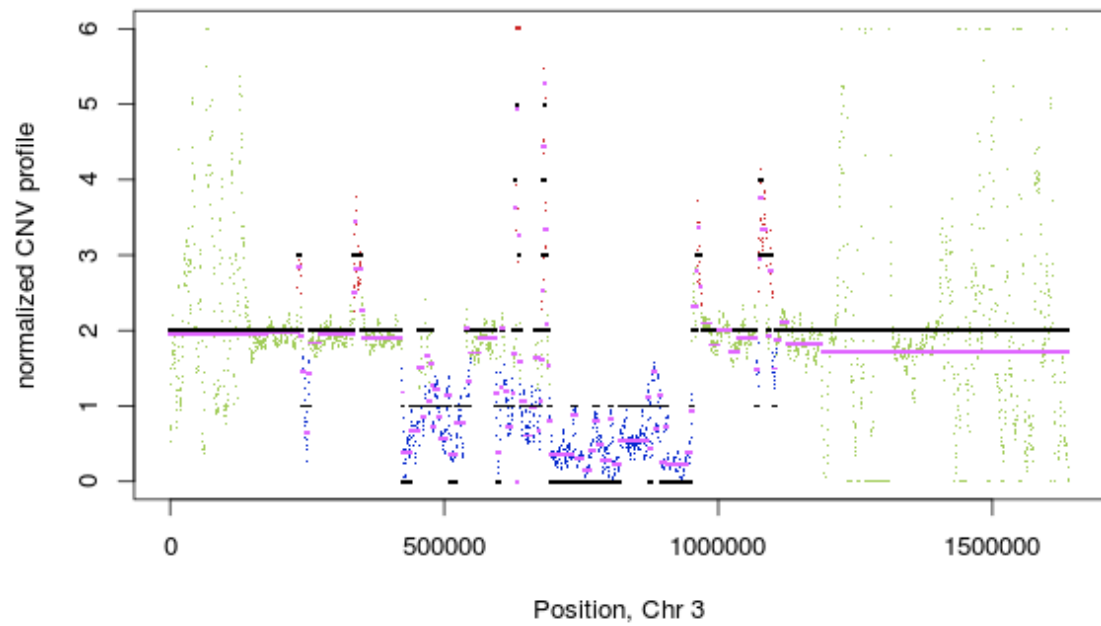

## CGI13

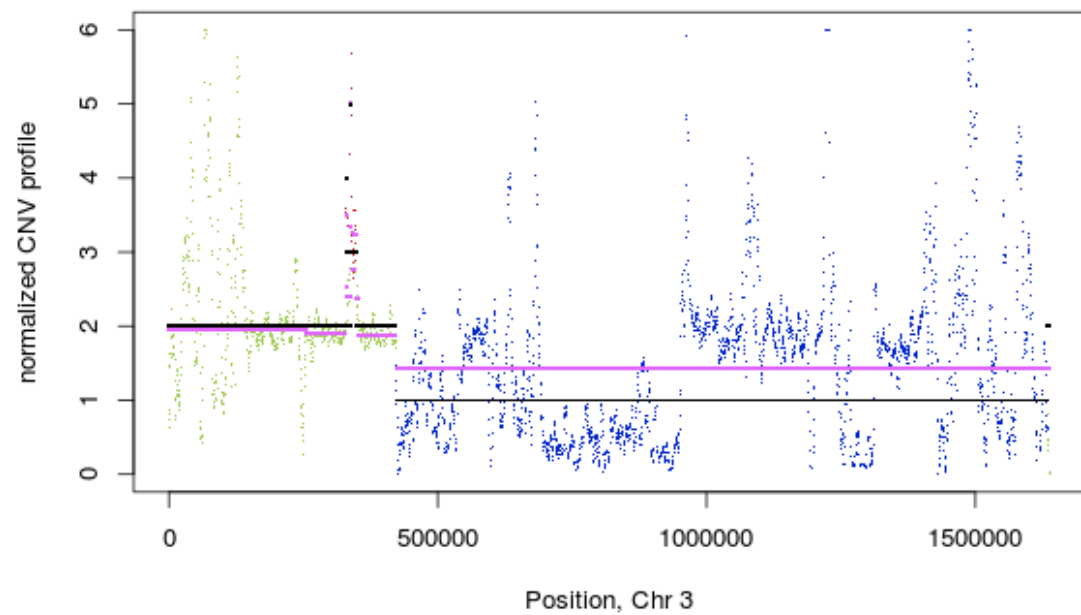

# Distribution of CNV in chromosome 4 of the Colombian FcHc clones

## FcHc1

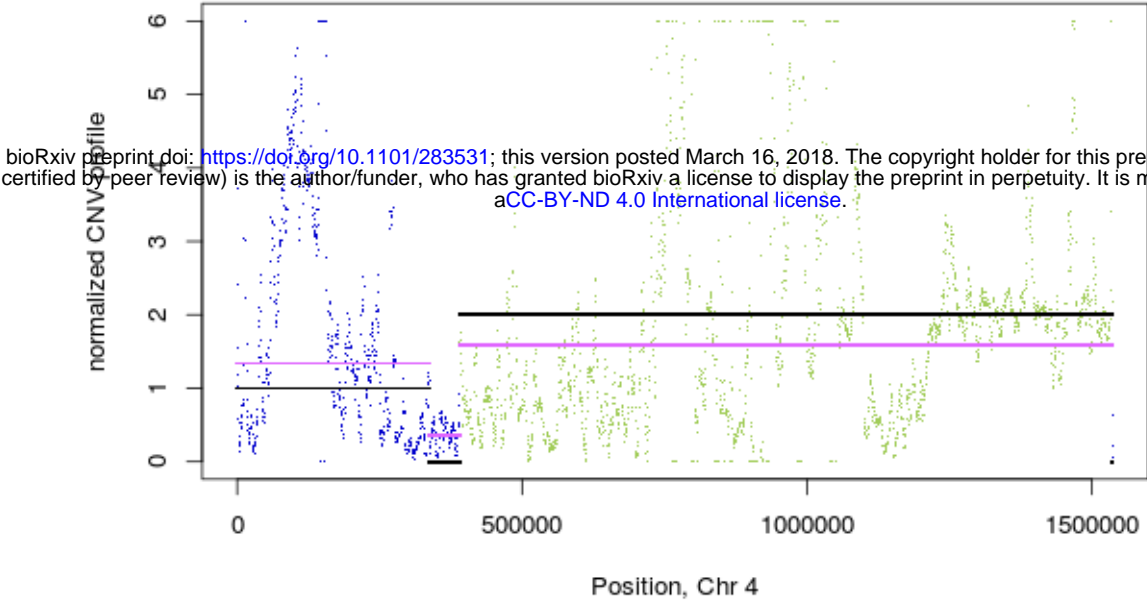

## FcHc2

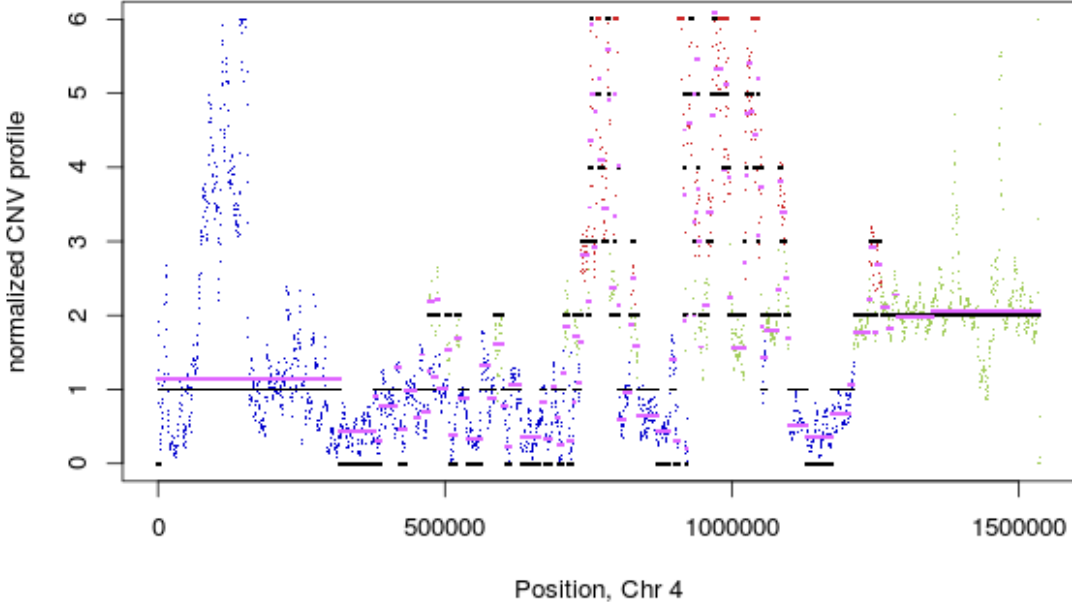

## FcHc4

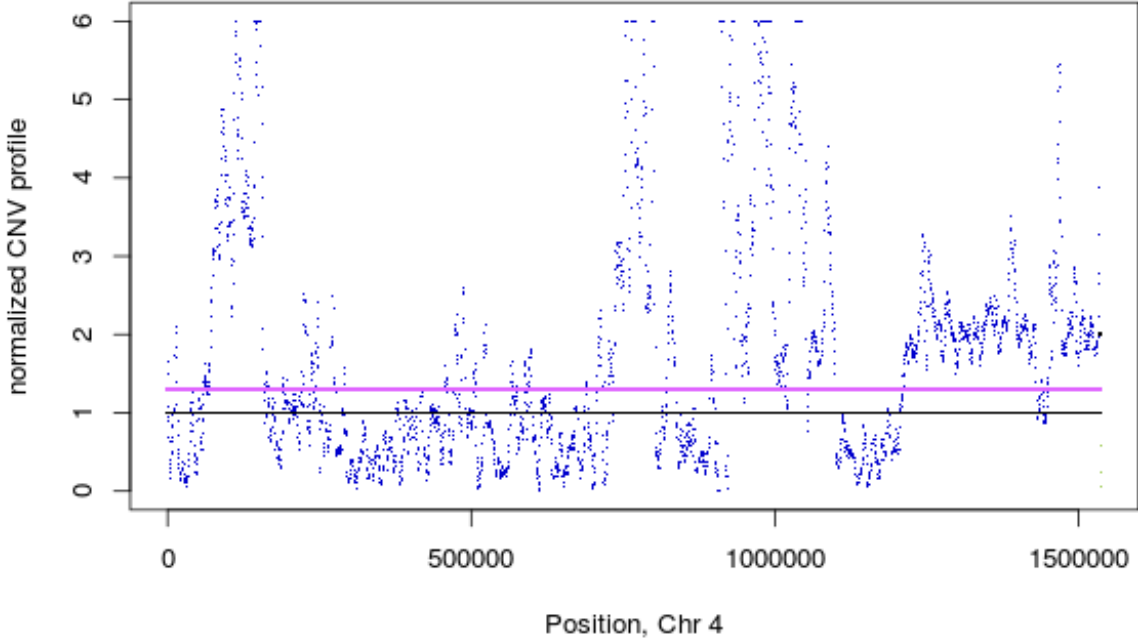

Source: http://biorxiv.org/content/10.1101/283531v1.full.pdf
